1 **A robust sequencing assay of a thousand amplicons for the**  
2 **high-throughput population monitoring of Alpine ibex**  
3 **immunogenetics**

4

5

6 Camille Kessler<sup>1</sup>, Alice Brambilla<sup>2,3</sup>, Dominique Waldvogel<sup>2</sup>, Glauco Camenisch<sup>2</sup>, Iris Biebach<sup>2</sup>,  
7 Deborah M Leigh<sup>2,#</sup>, Christine Grosse<sup>2,§,\*</sup>, Daniel Croll<sup>1,§,\*</sup>

8

9

10 <sup>1</sup> Laboratory of Evolutionary Genetics, Institute of Biology, University of Neuchâtel, Neuchâtel,  
11 Switzerland

12 <sup>2</sup> Department of Evolutionary Biology and Environmental Studies, University of Zürich, Zürich,  
13 Switzerland

14 <sup>3</sup> Alpine Wildlife Research Center, Gran Paradiso National Park, Italy

15 # Present address: WSL Swiss Federal Research Institute, Zürcherstrasse 111, 8903 Birmensdorf,  
16 Switzerland

17 § These authors contributed equally to this work

18 \*) Corresponding authors: [christine.grosse@uzh.ch](mailto:christine.grosse@uzh.ch), [daniel.croll@unine.ch](mailto:daniel.croll@unine.ch)

19

20

21 Running head: Targeted immunogenetics amplicon sequencing

22 **Abstract (~250 words)**

23 Genetic variation is a major factor determining susceptibility to diseases. Polymorphism at the major  
24 histocompatibility complex (MHC) and other immune function loci can underlie health and  
25 reproductive success of individuals. Endangered species of low population size could be severely  
26 compromised to evolve disease resistance due to reduced adaptive variation. A major impediment to  
27 screen adaptive genetic variation in wild species is the difficulty to comprehensively genotype immune-  
28 related loci based on low input material. Here, we design and validate a targeted amplicon sequencing  
29 assay to parallelize the analysis of a thousand loci of the MHC, other immunity-related genes, and  
30 genome-wide markers for the assessment of population structure. We apply the approach to Alpine  
31 ibex, one of the most successful examples of restoration of a large mammal in Europe. We used 51  
32 whole genome sequenced individuals to select representative target SNPs. We integrated SNP call data  
33 from four related species for amplification robustness and genotyped 158 Alpine ibex individuals for  
34 validation. We show that the genome-wide markers perform equally well at resolving population  
35 structure as RAD-seq or low-coverage genome sequencing datasets with orders of magnitude more  
36 markers. The targeted amplicon sequencing assay is robust to >100-fold variation in input DNA  
37 quantity and generates useful genotype information from fecal samples. The amplicon marker set also  
38 identified recent species hybridization events with domestic goats. The immune loci show unexpectedly  
39 high degrees of differentiation within the species. Our assay strategy can realistically be implemented  
40 into population genetic surveys of a large range of species.

41

42

## 43 **Introduction**

44 Biodiversity is currently undergoing a dramatic decline caused by ecological and anthropological  
45 pressures (Barnosky et al., 2011; G. Ceballos et al., 2015; Gerardo Ceballos et al., 2017; Wwf, 2018).  
46 Endangered species are particularly prone to genetic risks due to population bottlenecks and habitat  
47 fragmentation that lead to low genetic diversity, inbreeding, introgression from related species and  
48 deleterious mutation accumulation (Allendorf et al., 2010; Frankham, 2005). Low genetic diversity can  
49 affect fitness and survival, as shown for instance in cheetah, Florida panthers and Alpine ibex  
50 (Brambilla et al., 2015; O'Brien et al., 1983, 1985; Pimm et al., 2006; Reed & Frankham, 2003; Roelke  
51 et al., 1993). Loss of genetic diversity at adaptive immune loci is particularly problematic because  
52 populations will lack genetic variants conferring disease resistance, in particular infectious diseases, as  
53 it has been shown for example in amphibians (Kosch et al., 2019; Savage et al., 2011), Tasmanian devils  
54 (Siddle et al., 2007), giant panda (Zhu et al., 2020) and Alpine ibex (Brambilla et al., 2018). However,  
55 despite the importance for conservation management, the genetic underpinnings of disease  
56 susceptibility are largely unknown in most non-model species (Schoville et al., 2012). The major  
57 obstacles in investigating wildlife-immunogenetics are the challenge of collecting quantitatively and  
58 qualitatively adequate phenotypic data on diseases in wild populations, as well as the lack of genetic  
59 tools suitable in the conservation framework (Holderegger et al., 2019). Hence, there is a pressing need  
60 to establish effective genetic monitoring tools for many wild species (Acevedo-Whitehouse &  
61 Cunningham, 2006; Allendorf et al., 2010).

62

63 The major histocompatibility complex (MHC), a highly polymorphic region whose products are  
64 involved in foreign antigen recognition, is an important player for disease susceptibility in vertebrates.  
65 Co-evolution with pathogens often causes balancing selection on MHC polymorphism, maintaining  
66 high genetic diversity including deeply divergent alleles. Genetic variants under selection often encode  
67 the ability to present a wider range of antigens to T-cells and, thus, to recognize a greater variety of  
68 parasites. Consequently, heterozygotes often have elevated resistance and are favored by selection  
69 (Bernatchez & Landry, 2003). Species that underwent a strong bottleneck such as Alpine and Iberian

70 ibex (*Capra ibex* and *C. pyrenica*), Tasmanian devils, Cheetahs or Galapagos penguins (*Spheniscus*  
71 *mendiculus*), show strongly reduced genetic diversity at the MHC compared to related species  
72 (Angelone et al., 2018; Bollmer et al., 2007; Brambilla et al., 2018). Low genetic diversity in cheetahs  
73 is thought to have contributed to high mortality rates (O'Brien et al., 1983; 2017). High prevalence of  
74 a fatal facial cancer in Tasmanian devil is thought to, at least, partially stem from low MHC diversity  
75 (Siddle et al., 2007). Low levels of MHC diversity are consequently a major threat for endangered  
76 species. Alongside with the adaptive immune system, the innate immune system plays an important  
77 role in the defense against a wide range of pathogens. Genetic variation within some genes, *e.g.* Toll-  
78 like receptors (TLR), has been shown to be linked with variation in immune competence (Ammerdorffer  
79 et al., 2014; Tschirren et al., 2013). Yet the field of wildlife-immunogenetics is only emerging and  
80 immune-related genes outside of the MHC remain heavily understudied in wild species. The major  
81 challenge for monitoring non-model wild species is that inferring causal disease susceptibility from  
82 other species is only rarely possible and associations need to be established for each species – pathogen  
83 interaction (Acevedo-Whitehouse & Cunningham, 2006).

84

85 To make informed management decisions, the genetic health of populations should also be taken in  
86 account and assessed (Allendorf et al., 2010). Integrating information about immune-related  
87 polymorphisms and genetic diversity across the genome remains a major challenge. Conservation  
88 genetics studies largely rely on microsatellites (Allendorf et al., 2010; Brambilla et al., 2015; Ouborg  
89 et al., 2010; Witzemberger & Hochkirch, 2014), which are inexpensive and applicable for a wide range  
90 of input material. However, only in exceptional cases do microsatellites reveal adaptive genetic  
91 variation and are thus not applicable to most relevant immune-related polymorphism (Allendorf et al.,  
92 2010; Steiner et al., 2013). Similarly, modern conservation genomics methods based on restriction site  
93 associated DNA sequencing (*e.g.* RAD, ddRAD, GBS, Davey et al., 2011) intrinsically lack the power  
94 to target particular polymorphisms of interest in the genome (Garvin et al., 2010). Whole genome  
95 sequencing solves the issue of marker selection but is expensive and requires high-quality input material  
96 to work reliably (Davey et al., 2011). Conservation genetics monitoring requires targeted genotyping

97 assays that tolerate a wide range of input material, assess specific polymorphisms of interest and is cost  
98 effective.

99

100 Here, we develop and validate a high-throughput amplicon sequencing array, which enables  
101 immunogenetic monitoring of Alpine ibex. The species is an excellent model to assess the broad  
102 applicability of novel genotyping assays for conservation because of a dramatic recent bottleneck  
103 caused by a near extinction event in the 19th century (Grodinsky & Stüwe, 1987). The census size was  
104 reduced to less than 100 individuals limited to one single population in Northern Italy (Gran Paradiso).  
105 A captive breeding program restored the species to a current census of 53'000 across the European Alps  
106 (Brambilla et al., 2020). The historic bottleneck left substantial genome-wide signatures of low  
107 heterozygosity, in particular at MHC loci, which may threaten long-term population viability (Grossen  
108 et al., 2014, 2018, 2020). Hybridization events with domestic goat produced introgression tracts at the  
109 MHC re-establishing some genetic variation, which may have been lost due to the species bottleneck  
110 (Grossen et al., 2014). Recently, concerns were raised over population declines as direct and indirect  
111 consequences of epizootic disease outbreaks (*e.g.* sarcoptic mange, respiratory diseases, infectious  
112 keratoconjunctivitis, brucellosis). One recent disease outbreak concerned cases of brucellosis in the area  
113 of Bargy (France). Additional cases were identified in bovine and humans and were considered a  
114 broader threat (Mick et al., 2014). As the ibex were seen as a reservoir for the brucellosis pathogen,  
115 French authorities undertook a massive eradication program leading to the culling of more than 250  
116 individuals (44% of the estimated population) within two years following the outbreak (Mick et al.,  
117 2014; Quéméré et al., 2020). Hence, Alpine ibex present a model species where high-throughput  
118 monitoring of inbreeding levels, potential hybridization events and immunogenetic diversity can  
119 substantially improve genetic analyses and conservation management efforts.

120

121 We established a high-throughput assay of nearly a thousand loci covering largely genome-wide  
122 (putatively neutral) polymorphisms, variants found at the MHC and other immune-related loci as well  
123 as diagnostic variants useful to detect recent hybridization events with domestic goat. We used 51

124 whole-genome sequences of Alpine ibex and domestic goat to identify relevant SNPs to be targeted for  
125 the amplicons. Furthermore, we used whole genome sequences to mask polymorphism at primer sites  
126 to maximize amplification success. Based on highly parallel Illumina amplicon sequencing of 172  
127 Alpine ibex, Iberian ibex and domestic goat samples, we assessed the accuracy and robustness of the  
128 assay across highly variable input sample quality. Finally, we compared the high-throughput assay with  
129 RAD-seq and low-coverage whole-genome sequencing datasets on the same populations.

130

131

## 132 **Materials and methods**

### 133 *Collection of individuals and DNA extraction*

134 Genotyping was performed on 158 Alpine ibex samples, representing 8 populations with 19-20  
135 individuals each. The samples included also an individual suspected to be an albino. Sample material  
136 consisted either of tissue or blood collected either by biopsy darting, during captures or legal hunting  
137 (Biebach & Keller, 2009; Willisch et al., 2012). We included four fecal samples collected in the Gran  
138 Paradiso National Park as well as six individuals representing suspected hybrids based on field  
139 observations, five domestic goats (*Capra hircus*) and three Iberian ibex individuals. Detailed  
140 information about the origin, collection method and sampling year of each sample is provided in  
141 Supplementary Table S1. All DNA extractions were carried out using the DNeasy Blood & Tissue kit  
142 (QIAGEN).

143

### 144 *SNP discovery based on whole-genome sequenced individuals across species*

145 We used 29 Alpine ibex whole genome sequences (representing seven different populations) to identify  
146 segregating SNPs to design our target amplicons. 36 additional genome sequences (4 Iberian ibex, 16  
147 domestic goats, 6 bezoar, 2 Siberian ibex, 2 Nubian ibex, 1 Markhor and 5 sheep, see (Grossen et al.,  
148 2020) for details) were used to detect diagnostic markers and to mask highly polymorphic regions (see  
149 below). Data from domestic goat, bezoar and sheep were produced by the NextSeq Consortium.  
150 Trimmed reads (Trimmomatic v.0.36, (Bolger et al., 2014) were mapped using bwa-mem (Li et al.,

151 2009) to the domestic goat reference genome (version ARS1, Bickhart et al., 2017) and duplicates were  
152 marked using MarkDuplicates from Picard (<http://broadinstitute.github.io/picard>, v.1.130). After  
153 genotype calling using HaplotypeCaller and GenotypeGVCF (McKenna et al., 2010; GATK, v.4.0.8.0,  
154 Van der Auwera et al., 2013), SNPs were removed using VariantFiltration of GATK if:  $QD < 2.0$ ,  $FS >$   
155  $40.0$ ,  $SOR > 5.0$ ,  $MQ < 20.0$ ,  $-3.0 > MQRankSum > 3.0$ ,  $-3.0 > ReadPosRankSum > 3.0$  and  $AN < 46$   
156 (80% of all Alpine ibex individuals). We identified a total of 138 million SNPs segregating among all  
157 analyzed species with 5.3 million SNPs segregating among the 29 sequenced Alpine ibex. Genome-  
158 wide polymorphism was used in three ways to design amplicons for the high-throughput sequencing  
159 assay: (1) To discover SNPs variable in Alpine ibex to be targeted for amplification, (2) to discover  
160 SNPs differentially fixed between Alpine ibex and domestic goats (diagnostic markers). (3) to mask  
161 polymorphic sites near targeted SNPs to prevent designing primers on polymorphic sites potentially  
162 causing amplification drop-outs.

163

#### 164 *SNP effect prediction and selection*

165 We annotated SNPs using SnpEff v4.3t 2017-11-24 (Cingolani et al., 2012) with gene annotations  
166 produced for the domestic goat genome ARS1 as reference (Bickhart et al., 2017). SNPs located in  
167 repeat-masked regions of the reference genome were excluded to avoid designing amplicons in  
168 repetitive regions. We designed four types of marker sets.

169 Marker type 1 - Genome-wide, putatively neutral markers: For the design of genome-wide markers, we  
170 focused on SNPs segregating only among Alpine ibex individuals from the Gran Paradiso population,  
171 the source of all current Alpine ibex populations (4 million SNPs). Our aim was to most accurately  
172 reflect segregating neutral polymorphism in the species. Hence, including non-source individuals could  
173 lead to ascertainment bias. Loci were selected with a genotyping rate of  $\geq 70\%$ , a minimal genotyping  
174 quality of 20 and at a minimal distance of 2.3 Mb between adjacent SNPs.

175 Marker type 2 - To detect recent hybridization events, we identified loci with fixed alleles distinguishing  
176 domestic goats and Alpine ibex. Specifically, we chose loci with fixed allele frequency differences  
177 between all Alpine ibex and all goats (both domestic goat and bezoar), with a minimal genotyping rate

178 of 80%, a minimal genotyping quality of 20 and a minimal distance between adjacent SNPs of 13 Mb.  
179 Markers in genes relevant to the immune system were selected for two subgroups (here called MHC  
180 region and Immune, outside MHC) with a minimal allele count of 1 among Alpine ibex.  
181 Marker type 3 in MHC region: Because of the importance of the MHC region for immune functions  
182 and evidence for introgression from the domestic goat, we covered the entire MHC region on  
183 chromosome 23 (positions 20,892,916-23,588,623 bp). The chromosomal location of the MHC was  
184 identified using BLASTN v2.7.1+ (Altschul et al., 1990) based on gene sequences reported as belonging  
185 to the MHC in a previous goat genome assembly version (CHIR1, Dong et al., 2013, Supplementary  
186 Table S17). Additionally, we used gene ontology (GO) and gene homology to search for all MHC-  
187 related genes on chromosome 23. Matching gene sequences within 250 kb of the homologous MHC  
188 region of the CHIR1 assembly were considered as part of the MHC region for further analyses. We split  
189 the MHC region into 270 windows of 10 kb using bedtools v2.27.1 (Quinlan & Hall, 2010) to identify  
190 SNPs for the amplicon assay (Figure 1B). Evidence for introgression from domestic goat is particularly  
191 strong at the *DRB* exon 2 (Grossen et al., 2014). We hence designed the amplicon assay with more  
192 dense SNPs in the *DRB* region (positions 23,411,211-23,511,211, Figure 1B). The *DRB* was localized  
193 between positions 23,451,944-23,470,477 using BLASTN v2.7.1+ (Altschul et al., 1990) and the *DRB*  
194 sequence provided by (Dong et al., 2013). A buffer zone of 40'733 bp before and after the gene was  
195 added thereby also including gene ENSCHIG00000008942, which encodes immune-related functions  
196 (Figure 1B, lower panel). We divided the *DRB* region into 20 windows of 5 kb. We randomly selected  
197 a single SNP from every window in the defined MHC and *DRB* by prioritizing MODERATE impact  
198 mutations based on Snpeff and SNPs in coding regions. We manually selected a marker in the *DRB*  
199 exon 2 at position 23,460,796 bp.

200 Marker type 4: We targeted immune-related genes, outside of the MHC region on chromosome 23,  
201 based on a candidate gene approach using gene ontology (GO), gene homology, as well as literature  
202 reports (Acevedo-Whitehouse & Cunningham, 2006; Turner et al., 2011). We searched for all MHC-  
203 related GO terms on Ensembl Biomart in the goat genome. Then, we performed InterProScan v. 5.31-  
204 70.0 analyses and searched for protein domain annotations matching the term "histocompatibility". For



205 the lists by Acevedo-Whitehouse and Cunningham (2006) and Turner et al. (2011), we focused on 211  
206 genes encoding important immune functions for mammals including interferons, interleukins, toll-like  
207 receptors (TLR) and MHC-related genes outside of the MHC region on chromosome 23. Each retained  
208 gene locus was targeted by a single SNP prioritizing SNPs in coding sequences or with a MODERATE  
209 impact annotation based on SnpEff (Supplementary Table S2).

210

### 211 *Amplicon design*

212 For each amplicon to be designed, we extracted a 1001 bp sequence from the domestic goat reference  
213 genome centered around the target SNP (IUPAC encoded) using bcftools v1.9  
214 (<https://www.htslib.org/>). The extracted sequences had masked positions for all repetitive regions  
215 (masked reference genome) and positions which were polymorphic in Alpine ibex and/or with a minor  
216 allele count of three among all other *Capra* species (samtools v. 1.9 with option -m; (Li et al., 2009)).  
217 Sequences with more than 50% masked bases or sequences overlapping between different amplicon  
218 sets were excluded. We obtained a set of 1589 sequences for assay primer design by Fluidigm Inc.  
219 About 25% of the sequences were rejected by Fluidigm due to the lack of primer options matching the  
220 design criteria, leaving 1265 sequences for oligonucleotide primer synthesis (Figure 1). The targeted  
221 amplicon length was 200 bp.

222

### 223 *Targeted DNA sequencing library preparation and SNP calling*

224 We prepared libraries following the manufacturer protocol "Library Preparation with the LP 192.24  
225 IFC" using the Fluidigm Inc. Juno system, except for the minimal concentration of genomic DNA. Due  
226 to very low reaction volumes, the manufacturer recommends  $\geq 100$ -200ng/ $\mu$ l. As most samples  
227 wouldn't have reached that, we decided to use a minimal concentration of 50ng/ $\mu$ l. Samples also failing  
228 the concentration of 50ng/ $\mu$ l of genomic DNA, were concentrated using Ampure magnetic beads,  
229 whereas those, for which concentration to 50ng/ $\mu$ l was not possible due to low starting volumes, were  
230 used at the original concentration.

231 Barcoded and quality checked libraries were sequenced on a single lane of an Illumina NextSeq 500 in  
232 mid-output mode adding ~30% PhiX to avoid potential problems due to low sequence complexity. We  
233 demultiplexed raw read data using bcl2fastq v2.19.0.316 and used Trimmomatic v0.38 (Bolger et al.,  
234 2014) for quality trimming. Forward and reverse reads were merged using FLASH v1.2.11 (Magoč &  
235 Salzberg, 2011) and aligned to the goat reference genome ARS1 using bowtie2 v2.3.5 (Langmead &  
236 Salzberg, 2012). Read depths for each step were estimated with MultiQC v.1.7 (Ewels et al., 2016). We  
237 called SNPs using HaplotypeCaller, CombineGVCFs and GenotypeGVCFs from GATK v4.0.1  
238 (McKenna et al., 2010; Van der Auwera et al., 2013). Variant sites were further filtered to meet the  
239 following conditions:  $QD < 5$ ,  $MQ < 20$ ,  $-2 > ReadPosRankSum > 2$ ,  $-2 > MQRankSum > 2$ ,  $-2 >$   
240  $BaseQRankSum > 2$ .

241

#### 242 *Marker system performance on Alpine ibex populations*

243 To evaluate key performance metrics of the new high-throughput amplicon sequencing assay, we  
244 compared the outcome against two major classes of current population genomics sequencing  
245 approaches: RAD-seq and low-coverage whole genome sequencing. We used datasets reporting  
246 analyses on four populations also included in our study (Grossen et al., 2018, 2020; Leigh et al., 2018):  
247 the founder population of Gran Paradiso and the three Swiss populations Pleureur, Brienzer Rothorn  
248 and Albris. Because high-coverage whole genome sequencing is not feasible for large scale, practical  
249 applications, we generated realistic, low-coverage datasets at approximately 1x coverage. For this, we  
250 downsampled 15 whole genome Illumina sequencing datasets (Grossen et al., 2020). We used  
251 sambamba v.0.6.6 (Tarasov et al., 2015) to downsample individual bamfiles to a fraction of 0.05  
252 (producing a final coverage of ~1x). We used the software ANGSD (Korneliussen et al., 2014) to  
253 calculate genotype likelihoods with the following options: `-doGlf 2`, `-doMajorMinor 1`, `-doMaf 1`, `-`  
254 `minMaf 0.05`, `-SNP_pval 1e-6`, `-minMapQ 20`, `-minQ 20`, `-skipTriallelic 1`, `-uniqueOnly 1`, `-`  
255 `remove_bads 1`, `-only_proper_pairs 1`. The resulting likelihoods were used to run PCAnsd (Meisner &  
256 Albrechtsen, n.d.) and NGSadmixmap (Skotte et al., 2013). For the RAD-seq dataset, we first trimmed reads  
257 using Trimmomatic v3.6 (Bolger et al., 2014) and performed read mapping using Hisat2 v.2.1 (Kim et

258 al., 2019) on the ARS1 reference genome. We de-duplicated bam files using Markduplicates from  
259 Picard v. v.2.5 (<http://broadinstitute.github.io/picard/>) and called SNPs on all autosomes (1-29) using  
260 the GATK v 4.1 pipeline with HaplotypeCaller, GenomicsDBimport and GenotypeGVCFs (McKenna  
261 et al., 2010). SNPs were flagged using the GATK VariantFiltration tool if any of the conditions were  
262 matched:  $QD < 2.0$ ,  $FS > 60.0$ ,  $SOR > 3.0$ ,  $MQ < 30.0$ ,  $-12.5 > MQRankSum > 12.5$  and  $-8.0 >$   
263  $ReadPosRankSum$ . Next, we filtered for SNPs falling within 100 bp of a *SbfI* restriction cut site  
264 identified by *in silico* analyses with the ENSEMBL tool *restrict* (Yates et al., 2019). To compare  
265 genotyping performance between RAD-seq and the amplicon sequencing datasets, we filtered for a  
266 minimal individual genotyping rate of 0.5 and kept polymorphic sites only. We retained for the  
267 amplicon sequencing 892 SNPs genotyped in 75 individuals and for the RAD-seq 26,547 SNPs  
268 genotyped in 82 individuals. For all further analysis (population differentiation), we kept of the RAD  
269 seq dataset only bi-allelic SNPs with a minimal genotyping rate of 0.9, a minor allele frequency of 0.01  
270 and a heterozygosity below 0.8 ( $n = 8316$  SNPs retained). For the amplicon sequencing, we only  
271 retained SNPs from the genome-wide (neutral) set and removed sites on the Xa/b sex chromosome ( $n$   
272 = 588 SNPs).

273

#### 274 *Genetic data analyses*

275 Genetic data analyses were done using R 4.0.2 (R Core Team 2018). The R package {BioCircos} was  
276 used to generate the circular plot. Principal component analyses (PCAs) were performed using the  
277 glPCA function from the R package {adegenet}. The R package {hierfstat} was used for  $F_{ST}$   
278 calculations. The SNP intersection matrix was visualized with {UpSetR}. Genotype assignment plots  
279 were generated using sparse non-negative matrix factorization algorithms as implemented in the R  
280 package {LEA}. For each marker set, we ran 100 repetitions per K ( $K = 1-10$ ) with entropy=TRUE to  
281 find the most likely number of clusters (*i.e.* K with the lowest entropy). Tajima's  $D$  estimates in coding  
282 sequences (all immune-related genes represented on the amplicon) were calculated using the 29 Alpine  
283 ibex whole-genome sequencing datasets and the R package {PopGenome}.

284

## 285 **Results**

286

### 287 *Assessment of locus quality across the targeted sequencing assay*

288 We performed targeted amplicon sequencing of 1265 SNP loci covering genome-wide polymorphism  
289 and variants related to immune functions. The Fluidigm Inc. Juno microfluidics systems enables highly  
290 parallel amplification of all loci. We analyzed a total of 187 samples (representing 172 individuals) in  
291 a single run including 158 Alpine ibex, 5 domestic goats, 3 Iberian ibex and 6 suspected hybrids  
292 between Alpine ibex and domestic goats (Supplementary Table S1). HiSeq Illumina sequencing  
293 generated a total of 108 million read pairs after removal of PhiX spike-ins (32.4 Gbp total data). To  
294 assess genotyping quality across loci, we first focused only on samples that satisfied the manufacturer's  
295 recommended DNA concentration of  $\geq 50$  ng/ $\mu$ l. Furthermore, we required that each analyzed individual  
296 produced at least 100'000 mapped reads across all loci (Figure 2A). The 65 retained individuals  
297 represented 7 different Alpine ibex populations, 2 domestic goat breeds as well as 3 Iberian ibex. The  
298 number of mapped reads ranged from 230'801-1'576'615 reads (Supplementary Table S3). Based on  
299 these high-quality samples, we found that the median read depth per locus was high with nearly all loci  
300 having  $>20$  reads (median across loci = 389 reads). We found 7 loci with a median read depth of 0. The  
301 highest median read depth was 1931 for a marker designed in the MHC. Next, we analyzed the  
302 genotyping rate across loci and found that 940 loci were genotyped in all high-quality samples and 989  
303 loci were genotyped in more than 75% of samples (Figure 2C). We discarded 28 loci with a genotyping  
304 rate below 75% to prioritize loci providing the highest information content across individuals. We  
305 retained a total of 989 high-quality loci for further analysis (Figure 2D).

306

### 307 *Assessment of genotyping rate and accuracy*

308 The mean genotyping quality (GQ) across the 65 high-quality samples was on average 96 (Figure 3A).  
309 Taking advantage of four Alpine ibex individuals, which were both whole-genome sequenced and  
310 genotyped using our assay, we analyzed the overall accuracy of genotypes. Among the four individuals,  
311 a total of 62 loci were not assigned a genotype based on whole-genome sequencing. On average, 901

312 loci (range: 883-910, Figure 3B) showed perfectly matching genotypes and twenty loci (range: 17 - 27,  
313 Figure 3B) showed one mismatching allele (*i.e.* heterozygote vs. homozygote mismatch). The average  
314 genotype quality of the mismatched genotypes was 63 while it was 96 for matching genotypes. We  
315 found no complete allelic mismatch in any of the four individuals (*i.e.* homozygous calls for distinct  
316 alleles). An effective high-throughput genotyping assay should perform sufficiently well for low sample  
317 input quantity and quality. To establish a benchmark for input DNA sensitivity, we analyzed dilution  
318 series of input DNA. We found that genotyping rates >90% across loci are retained by diluting samples  
319 25-fold from 100 ng/ $\mu$ l down to 4 ng/ $\mu$ l (Figure 3C). At 0.8 ng/ $\mu$ l, the genotyping rate was >75% for  
320 two out of three samples. The genotyping rate was >23% for 0.16 ng/ $\mu$ l of DNA (625-fold dilution).  
321 Challenging samples typically include fecal samples, which are contaminated with non-target DNA  
322 (*e.g.* plant and bacterial origin) and show elevated levels of overall DNA degradation. Therefore, we  
323 analyzed the performance of four DNA samples collected from Alpine ibex feces in the Gran Paradiso  
324 National Park. Three of the four fecal samples had a 25% genotyping rate (*i.e.* 248-270 genotyped loci).  
325 The fecal sample with the lowest quality had a 10.3% genotyping rate corresponding to 102 genotyped  
326 loci. Samples with low genotyping rates typically show inconsistently genotyped loci across samples.  
327 We found that this was indeed the case with 41-133 of the loci being genotyped in only one out of four  
328 fecal samples. A total of 41 loci were genotyped in at least three fecal samples (Figure 3D).

329

### 330 *High-resolution population structure*

331 A major reason for genotyping species of conservation concern is the identification of population  
332 subdivisions and admixture events. We expanded our genotyping assay to the full set of Alpine ibex  
333 samples ( $n = 158$ ) spanning the extant distribution range across the Alps. Based on a PCA, we identified  
334 three major genotype clusters. The largest cluster was composed of the Gran Paradiso source population  
335 and populations reintroduced directly from Gran Paradiso to Italy or Switzerland (Figure 4A). A second  
336 cluster grouped the two French populations Haute Maurienne and Champsaur (the latter founded with  
337 individuals coming from the former). The third cluster was composed of the isolated Alpi Marittime  
338 population, which is thought to have only six effective founder individuals (Terrier & Rossi, 1994). The

339 identified population structure was also supported by individual ancestry coefficients using a sparse  
340 non-negative matrix factorization algorithm (K=3, Figure S1, Frichot et al. 2014). At the K with the  
341 lowest entropy (K=5, Figure S2), the analyses revealed a fine-scale population structure: all populations  
342 except for the two French populations Haute Maurienne and Champsaur, were clearly distinct (Figure  
343 4C). The genotyping assay performed also well for population-level assignments of the low-  
344 input/quality samples. All four Gran Paradiso fecal samples had similar principal component values  
345 (Figure 4A) and structure population assignments (Figure 4C) as other, high quality samples from the  
346 same population. We also analyzed population differentiation of Alpine ibex using pairwise  $F_{ST}$  (Fig.  
347 4B). We found a consistent pattern separating Alpi Marittime from all other populations. Furthermore,  
348 the two French populations showed relatively low differentiation consistent with their foundation  
349 history: the Champsaur population was founded only 25 years ago (less than 4 ibex generations) with  
350 31 individuals coming from Haute Maurienne. The three Swiss populations (Albris, Brienzer Rothorn  
351 and Pleureur) were only weakly differentiated from the Gran Paradiso source population as expected  
352 from former analysis based on microsatellites (Biebach & Keller, 2009).

353

#### 354 *Performance contrasts among next-generation sequencing methods*

355 Next-generation sequencing methods for population monitoring can have distinct advantages or  
356 drawbacks. In contrast to the newly developed targeted amplicon sequencing for Alpine ibex, reduced  
357 representation (e.g. RAD-seq) and low-coverage whole genome sequencing have the potential for  
358 orders of magnitude larger numbers of scorable SNPs but of potentially lower genotyping quality and  
359 higher missingness. To objectively assess the performance of the newly developed assay, we analyzed  
360 genotyping outcomes of four core Alpine ibex populations (Gran Paradiso, Pleureur, Albris and  
361 Brienzer Rothorn; Figures 5, S2). After quality filtering of each dataset to ensure objective comparisons  
362 (see Methods), we retained 892 loci from targeted amplicon sequencing ( $n = 75$  individuals), 26,547  
363 RAD-seq loci ( $n = 82$  individuals) and 3 Mio low-coverage whole genome sequencing loci ( $n = 15$   
364 individuals). Overall, 97% of the individuals had a per-individual genotyping rate of  $\geq 90\%$  for targeted  
365 amplicon sequencing loci contrasting with 23% of the individuals genotyped at  $\geq 90\%$  for RAD-seq

366 loci (Figure 5A). Enforcing a per-locus genotyping rate of  $\geq 90\%$  over all individuals, 96% of targeted  
367 amplicon sequencing loci but only 39% of RAD-seq loci were retained (Figure 5B). Locus and  
368 individual-level genotyping rates cannot meaningfully be retrieved from genotype likelihood-based  
369 analyses (low-coverage whole genome sequencing dataset). We performed comparative population  
370 differentiation analyses and found that the global  $F_{ST}$  ranged between 0.071 (RAD-seq) and 0.077  
371 (targeted amplicon sequencing). Pairwise  $F_{ST}$  estimates were also similar among marker systems  
372 (Figure 5C). PCAs constructed from targeted amplicon sequencing and RAD-seq markers clearly  
373 resolved the four populations (Figure 5D, E). However, the low-coverage whole genome sequencing  
374 did not resolve Albris and Brienzer Rothorn populations (Figure 5F). The first and second principal  
375 component (PC) axes explained 6.2% and 4.9% for the targeted amplicon sequencing (Figure 5D), 5.2%  
376 and 4.2% for the RAD-seq (Figure 5E) and 23.8%-6.1% for the low-coverage whole genome  
377 sequencing (Figure 5F), respectively. Genotype assignments to clusters showed clear population  
378 differentiation for the targeted amplicon sequencing markers (Figure 5G) and slightly weaker resolution  
379 for RAD-seq markers (Figure 5H). Low-coverage whole genome sequencing genotyping clearly  
380 separated Gran Paradiso and Pleureur populations but again failed to resolve Albris and Brienzer  
381 Rothorn populations (Figure 5I).

382

### 383 *Detection of recent hybrids and introgression tracts*

384 Introgression from domesticated animals is a major concern for a number of wild species. A set of SNP  
385 markers in the set of amplicons were specifically designed to detect introgression from domestic goats  
386 into Alpine ibex. To assess the power to discriminate genotypes suspected to be from hybrid individuals,  
387 we performed a PCA including all 158 Alpine ibex individuals, suspected hybrids based on field reports  
388 of unusual phenotypes ( $n = 6$ ), domestic goats ( $n = 5$ ) and Iberian ibex ( $n = 3$ ; Figure 6A). As expected,  
389 the first PC clearly separated domestic goats, Iberian ibex, as well as Alpine ibex. The second PC  
390 differentiated the Alpi Marittime population from all other Alpine ibex. The suspected hybrid individual  
391 from Alpi Marittime (AM\_H) clearly clustered with domestic goats. Two additional suspected hybrids  
392 (GR\_ib1, GR\_ib2), as well as a potential albino individual (FR\_blanco) has largely whitish fur, but no



393 red eyes) clustered with Alpine ibex. Three suspected hybrids (TI\_ib, GPHB1 and GP\_ib\_V02\_17)  
394 were located near the mid-point between domestic goats and Alpine ibex matching expectations for  
395 recent (F1 or backcross) hybrid genotypes.

396 Using the goat-Alpine ibex diagnostic marker set, we analyzed the recency of the hybridization event  
397 by identifying contributions from each parental species (Figure 6B). Of the six suspected hybrids and  
398 one potential albino, two individuals were confirmed to be Alpine ibex (FR\_blanc, GR\_ib1) and one a  
399 domestic goat (AM\_H). Our results confirm that the unusual phenotype of FR\_blanc reported from the  
400 field was not caused by domestic goat introgression. Individual GR\_ib1 was suspected to be a hybrid  
401 because it was behaving in very unusual ways, seeking proximity to buildings. Individual AM\_H was  
402 reported to resemble domestic goat but was living among Alpine ibex. Another suspected hybrid  
403 (GR\_ib2) with white hoofs showed a weak sign of domestic goat introgression (only one marker on  
404 chromosome 10 was heterozygous) suggesting a potential backcross. Note that GR\_ib2 showed no clear  
405 differentiation from Alpine ibex based on the genome-wide marker PCA underlining the usefulness of  
406 specifically designed diagnostic loci. Two individuals (GP\_ib\_V02\_17 and GPHB) showed signs of  
407 ~25% domestic goat introgression (*i.e.* likely F2 backcrosses). GP\_ib\_V02\_17 had darker fur than  
408 commonly seen in Alpine ibex and an unusual horn shape (no nodes and a triangular transverse section).  
409 Chromosome painting showed one individual was being heterozygous for all diagnostic markers (TI\_ib,  
410 Figure 6C), hence representing very likely an F1 hybrid. This individual was observed going into a  
411 stable following goats and had an unusual horn shape. The DNA from GPHB was from a small amount  
412 of blood stored on FTA paper explaining the poor genotyping quality. Field reports suspected a F1  
413 hybrid but both the contribution plot (Figure 6B) and the chromosomal painting (Figure 6C) suggest a  
414 F2 hybrid. Our analyses show the power of highly discriminatory markers to detect recent hybridization  
415 and introgression events in a pool of individuals with field-reported, suspected admixture.

416

#### 417 *Immunogenetics of Alpine ibex populations*

418 The targeted amplicon sequencing specifically focused on 297 polymorphisms in immune-related genes  
419 within and outside the MHC. Using whole-genome sequencing data for Alpine ibex ( $n = 29$ ), we found



420 that the Tajima's  $D$  in Alpine ibex ranged from -2.4 to 4.5 across all genes encoded in the MHC region  
421 and from -1.4 to 2.5 for all immune-related genes outside of the MHC region targeted by the amplicon  
422 sequencing. The median Tajima's  $D$  was lower in the MHC (0.45) compared to immune loci outside of  
423 the MHC (1.3, Figure 7A). The high Tajima's  $D$  values in some immune-related loci suggest long-term  
424 maintenance of alleles through balancing selection (Figure 7A). Comparing different sets of amplicon  
425 targets in our assay, we found that the genome-wide markers aimed at resolving population structure  
426 showed overall the highest average heterozygosity (Figure 7C). The lowest genome-wide  
427 heterozygosity was found in Alpi Marittime consistent with the severe founding bottleneck. Immune-  
428 related and MHC loci showed consistently lower levels of heterozygosity compared to genome-wide  
429 loci. With a notable exception of the Alpi Marittime population where the MHC showed higher levels  
430 of heterozygosity (0.25) than other immune-related and genome-wide markers (Figure 7C). The MHC  
431 of the Albris population showed a surprisingly low average heterozygosity (0.11) compared to genome-  
432 wide markers. On a PCA, the MHC in domestic goat and Iberian ibex showed a low degree of  
433 differentiation (Figure 7D). This is likely explained by the focus on segregating polymorphism in  
434 Alpine ibex only. MHC genotypes showed tight clusters among Alpine ibex individuals but only weak  
435 population signatures, which is in marked contrast to genome-wide markers (Figure 4A, 7D). Clusters  
436 of nearly identical Alpine ibex genotypes were generally composed of genotypes from multiple  
437 populations. The two French populations Haute Maurienne and Champsaur shared most MHC  
438 genotypes. Individuals from the Alpi Marittime were largely distinct from all other populations with  
439 the exception of a shared genotype with the Italian population Tarvisio. Some individuals from Alpi  
440 Marittime were translocated to Tarvisio in 1993, which may explain our finding.

441

442

## 443 **Discussion**

444 Genetic monitoring is central to many population surveys and conservation efforts. However, there is  
445 currently no established implementation enabling both targeted and highly parallelized genotyping.  
446 Here, we developed an accurate and versatile tool based on whole-genome sequence derived SNP loci  
447 for the monitoring of Alpine ibex population health. The set of nearly a thousand loci enables the  
448 concurrent assessment of population structure, the detection of recent hybridization events and immune  
449 function related genotypes. We show that our new amplicon array performs well even with low-input  
450 samples. The amplicon sequencing also performs at least equally well as other widely used population  
451 genomic approaches while providing key implementation advantages.

452  
453 Effective high-throughput genotyping relies on the consistent amplification of a large number of loci  
454 and robustness to variation in input DNA quality. We show that the targeted sequencing approach  
455 produces largely uniform coverage both across a thousand loci and nearly 200 samples of highly  
456 variable DNA quantity and quality. Integrating whole-genome sequencing derived SNPs from different  
457 species into the design of amplicons allowed us to amplify across Alpine ibex, Iberian ibex and the  
458 domestic goat. This extends the usability of the assay with the caveat that the potential ascertainment  
459 bias in other species should be considered because SNPs were selected based on polymorphism in  
460 Alpine ibex only. Furthermore, the identified genotypes were well-validated by cross-referencing with  
461 the whole-genome sequencing datasets. Uniform, high-accuracy genotyping with low input DNA has  
462 previously only been achieved through microsatellite marker analyses (Hodel et al., 2016) or SNP chips  
463 designed on related model species (Cronin et al., 2015; Pertoldi et al., 2009). Compared to amplicon  
464 sequencing, SNP chips often lack extensibility and provide no sequence information surrounding the  
465 genotyped loci. An application of SNP chip genotyping in Alpine ibex by (Grossen et al., 2014) was  
466 based on a 52 K Illumina Goat SNP Chip (Tosser-Klopp et al., 2015). Among 95 Alpine ibex  
467 individuals, the study recovered 677 polymorphic markers out of a total of ~52'000 markers known to  
468 be polymorphic among domestic goats. This shows how even SNP chips designed for closely related  
469 species can be largely unsuitable and may suffer from substantial ascertainment bias. High-throughput

470 methods such as RAD-seq and GBS sequencing are the most widely used next-generation sequencing  
471 approaches for non-model species often producing at least tens of thousands of SNPs. However, such  
472 restriction-based reduced representation approaches do not allow the targeting of specific loci (e.g.  
473 immune-relevant loci) and often produce highly uneven read depth across loci (Jiang et al., 2016).  
474 Furthermore, we show that replicating RAD-seq and low-coverage whole genome sequencing on the  
475 same set of populations analyzed in our targeted amplicon sequencing approach produces a highly  
476 similar resolution of the genetic structure. The comparatively low number of SNPs assayed in the  
477 targeted amplicon sequencing is most likely compensated by the highly consistent genotyping rates  
478 across loci and individuals.

479  
480 We show that the microfluidics approach for amplicon sequencing produces consistent amplification  
481 across nearly all loci if minimum DNA requirements are fulfilled. We have set a minimum threshold of  
482 50 ng/ $\mu$ l (or a total of 100 ng), which is usually achievable for well preserved tissue samples. We have  
483 also investigated the potential to recover genotypes from degraded and low-concentration samples such  
484 as fecal material. Fecal sampling is a widely used non-invasive sampling method and sometimes the  
485 only option for elusive species (Beja-Pereira et al., 2009). Fecal samples produce low quality  
486 (degradation) and low quantity DNA. In addition, fecal DNA samples can be heavily contaminated with  
487 bacteria, plant or prey DNA. Hence, the actual endogenous DNA is often much below the measured  
488 total DNA concentration. We analyzed fecal DNA quantities from 4-23 ng/ $\mu$ l but found that the  
489 proportion of successfully amplified loci was comparable to diluted non-fecal DNA at around 0.1 ng/ $\mu$ l.  
490 Consequently, non-targeted sequencing methods (e.g. RAD or whole-genome sequencing) would  
491 require very significant sequencing depth to adequately genotype endogenous DNA of such samples,  
492 because a large proportion of reads would be lost to non-endogenous DNA. We show that if analyses  
493 of fecal samples are combined with good quality samples, genotypes recovered from fecal DNA can be  
494 reliably assigned to individual populations. Furthermore, multiple amplifications of the same fecal  
495 samples could result in even better overall genotyping rates. The broad range of acceptable input DNA  
496 makes the targeted amplification of selected polymorphisms widely applicable across study systems

497 provided that genomic resources from a small number of individuals are available for the assay  
498 development.

499  
500 To assess the resolution of the genome-wide set of amplicon markers, we have genotyped a collection  
501 of Alpine ibex samples representing all major reintroduction events. Alpine ibex were limited to the  
502 Gran Paradiso National Park in Italy in the 19<sup>th</sup> century. Starting in the early 20<sup>th</sup> century, populations  
503 were introduced independently from Gran Paradiso to Switzerland, France and Italy and from there  
504 further populations were founded. The population structure of extant Alpine ibex populations are  
505 dominated by signals of population reintroductions and translocations (Biebach & Keller, 2009;  
506 Grossen et al., 2018). The Alpine ibex genotypes assessed by our targeted sequencing approach  
507 confirmed all major aspects of the reintroduction history including placing Gran Paradiso at the center  
508 of the extant genetic diversity. Populations reintroduced directly from Gran Paradiso were at the closest  
509 genetic distances to the source population yet showed distinct clustering as expected from the strong  
510 bottlenecks imposed by the translocation of few individuals. A major concern for wild species co-  
511 occurring with closely related domestic animals is the potential for hybridization and introgression.  
512 Alpine ibex populations across Europe are monitored for the presence of individuals with atypical  
513 phenotypes (e.g. Giacometti et al., 2004; Steyer et al., 2016; Todesco et al., 2016). We assessed  
514 genotypes of seven suspected hybrids (including one potential albino) and could show that only three  
515 individuals are clearly identifiable as recent hybrids. One individual showed possible signs of past  
516 introgression and three suspected hybrids clustered either with domestic goat or Alpine ibex genotypes  
517 highlighting the importance of genetic monitoring of suspected hybridization events.

518  
519 A major genetic factor for the long-term survival of endangered species is diversity at important  
520 immune loci, in particular the MHC. We successfully amplified hundreds of loci involved in key  
521 immune functions focusing on non-synonymous polymorphisms. In parallel, we amplified a dense array  
522 of loci spanning the MHC. This 2-Mb locus on chromosome 23 recently received genetic material from  
523 domestic goats regenerating heterozygosity at the DRB locus (Grossen et al., 2014). Genotypes across

524 the MHC clustered tightly among populations revealing that Alpine ibex were genetically impoverished  
525 across the entire MHC. Comparative analyses with domestic goat breeds will enable a refinement of  
526 our understanding of historic and potentially ongoing introgression into the Alpine ibex gene pool. Our  
527 findings of low diversity at the MHC are also in accordance with previous studies based on  
528 microsatellite and RAD genotyping (*e.g.* (e.g. Alasaad et al., 2012; Brambilla et al., 2018; Grossen et  
529 al., 2014). Underlining the relevance of performing large-scale targeted amplicon sequencing of  
530 immune loci are recent findings that high heterozygosity at the MHC was correlated with higher  
531 resistance to infectious keratoconjunctivitis, a major disease factor in some Alpine ibex populations  
532 (Brambilla et al., 2018). Surveillance of disease susceptibility through genetic analyses of immune loci  
533 will also significantly improve conservation strategies by informing the choice of founder individuals  
534 prior to reintroductions.

535

536 In conclusion, our highly parallel targeted amplicon assay demonstrates how next-generation  
537 sequencing techniques can be adapted for the needs of population genetic surveys and conservation  
538 monitoring. The WGS-informed approach enabled selecting a highly specific set of loci to  
539 simultaneously address questions of population structure, recent hybridization events and how  
540 polymorphism is shaped across major components of the immune system. Efficient and precise  
541 characterization of individual genotypes can be translated into recommendations on how to prioritize  
542 translocation events and replenish genetic diversity at immune loci. The versatility to amplify the same  
543 loci across related species enables also powerful screens for recent introgression events. Our study  
544 shows the relevance of bridging population genomic investigations with assays that can be realistically  
545 implemented into population genetic surveys and decision-making for conservation management.

546

547

548

549

550 **Acknowledgements**

551 We are thankful to the scientific teams of the Gran Paradiso National Park, Parco Naturale Alpi  
552 Marittime, Parc National des Ecrins, Parc National de la Vanoise and Ente Foreste Tarvisio, for  
553 providing us with DNA samples from their Alpine ibex populations. Xenia Wietlisbach helped prepare  
554 samples. Targeted DNA sequencing and preparation was carried out at the Genetic Diversity Center  
555 (GDC) at ETHZ. This study makes use of data generated by the NextGen Consortium, which was  
556 supported by grant agreement number 244356 of the European Union's Seventh Framework  
557 Programme (FP7/2010-2014). This study was performed in the framework of the EU funded Interreg  
558 Alcotra V-A France-Italy 1664 LEMED-IBEX.

559

560

561 **References**

- 562 Acevedo-Whitehouse, K., & Cunningham, A. A. (2006). Is MHC enough for understanding wildlife  
563 immunogenetics? *Trends in Ecology & Evolution*, *21*(8), 433–438.
- 564 Alasaad, S., Biebach, I., Grossen, C., Soriguer, R. C., Pérez, J. M., & Keller, L. F. (2012).  
565 Microsatellite-based genotyping of MHC class II DRB1 gene in Iberian and Alpine ibex.  
566 *European Journal of Wildlife Research*, *58*(4), 743–748.
- 567 Allendorf, F. W., Hohenlohe, P. A., & Luikart, G. (2010). Genomics and the future of conservation  
568 genetics. *Nature Reviews. Genetics*, *11*(10), 697–709.
- 569 Altschul, S. F., Gish, W., Miller, W., Myers, E. W., & Lipman, D. J. (1990). Basic local alignment  
570 search tool. *Journal of Molecular Biology*, *215*(3), 403–410.
- 571 Ammerdorffer, A., Roest, H.-I. J., Dinkla, A., Post, J., Schoffelen, T., van Deuren, M., Sprong, T., &  
572 Rebel, J. M. (2014). The effect of *C. burnetii* infection on the cytokine response of PBMCs from  
573 pregnant goats. *PloS One*, *9*(10), e109283.
- 574 Angelone, S., Jowers, M. J., Molinar Min, A. R., Fandos, P., Prieto, P., Pasquetti, M., Cano-Manuel,  
575 F. J., Mentaberre, G., Olvera, J. R. L., Ráez-Bravo, A., Espinosa, J., Pérez, J. M., Soriguer, R. C.,  
576 Rossi, L., & Granados, J. E. (2018). Hidden MHC genetic diversity in the Iberian ibex (*Capra*  
577 *pyrenaica*). *BMC Genetics*, *19*(1), 28.
- 578 Barnosky, A. D., Matzke, N., Tomiya, S., Wogan, G. O. U., Swartz, B., Quental, T. B., Marshall, C.,  
579 McGuire, J. L., Lindsey, E. L., Maguire, K. C., Mersey, B., & Ferrer, E. A. (2011). Has the  
580 Earth's sixth mass extinction already arrived? *Nature*, *471*(7336), 51–57.
- 581 Beja-Pereira, A., Oliveira, R., Alves, P. C., Schwartz, M. K., & Luikart, G. (2009). Advancing  
582 ecological understandings through technological transformations in noninvasive genetics.  
583 *Molecular Ecology Resources*, *9*(5), 1279–1301.
- 584 Bernatchez, L., & Landry, C. (2003). MHC studies in nonmodel vertebrates: what have we learned  
585 about natural selection in 15 years? *Journal of Evolutionary Biology*, *16*(3), 363–377.
- 586 Bickhart, D. M., Rosen, B. D., Koren, S., Sayre, B. L., Hastie, A. R., Chan, S., Lee, J., Lam, E. T.,  
587 Liachko, I., Sullivan, S. T., Burton, J. N., Huson, H. J., Nystrom, J. C., Kelley, C. M., Hutchison,  
23

- 588 J. L., Zhou, Y., Sun, J., Crisà, A., Ponce de León, F. A., ... Smith, T. P. L. (2017). Single-  
589 molecule sequencing and chromatin conformation capture enable de novo reference assembly of  
590 the domestic goat genome. *Nature Genetics*, *49*(4), 643–650.
- 591 Biebach, I., & Keller, L. F. (2009). A strong genetic footprint of the re-introduction history of Alpine  
592 ibex (*Capra ibex ibex*). *Molecular Ecology*, *18*(24), 5046–5058.
- 593 Bolger, A. M., Lohse, M., & Usadel, B. (2014). Trimmomatic: a flexible trimmer for Illumina  
594 sequence data. *Bioinformatics*, *30*(15), 2114–2120.
- 595 Bollmer, J. L., Vargas, F. H., & Parker, P. G. (2007). Low MHC variation in the endangered  
596 Galápagos penguin (*Spheniscus mendiculus*). *Immunogenetics*, *59*(7), 593–602.
- 597 Brambilla, A., Biebach, I., Bassano, B., Bogliani, G., & von Hardenberg, A. (2015). Direct and  
598 indirect causal effects of heterozygosity on fitness-related traits in Alpine ibex. *Proceedings*.  
599 *Biological Sciences / The Royal Society*, *282*(1798), 20141873.
- 600 Brambilla, A., Keller, L., Bassano, B., & Grossen, C. (2018). Heterozygosity-fitness correlation at the  
601 major histocompatibility complex despite low variation in Alpine ibex (*Capra ibex*).  
602 *Evolutionary Applications*, *11*(5), 631–644.
- 603 Brambilla, A., Von Hardenberg, A., Nelli, L., & Bassano, B. (2020). Distribution, status, and recent  
604 population dynamics of Alpine ibex *Capra ibex* in Europe. *Mammal Review*, *50*(3), 267–277.
- 605 Ceballos, G., Ehrlich, P. R., Barnosky, A. D., Garcia, A., Pringle, R. M., & Palmer, T. M. (2015).  
606 Accelerated modern human-induced species losses: Entering the sixth mass extinction. *Science*  
607 *Advances*, *1*(5), e1400253–e1400253.
- 608 Ceballos, G., Ehrlich, P. R., & Dirzo, R. (2017). Biological annihilation via the ongoing sixth mass  
609 extinction signaled by vertebrate population losses and declines. *Proceedings of the National*  
610 *Academy of Sciences*, 201704949.
- 611 Cingolani, P., Platts, A., Wang, L. L., Coon, M., Nguyen, T., Wang, L., Land, S. J., Lu, X., & Ruden,  
612 D. M. (2012). A program for annotating and predicting the effects of single nucleotide  
613 polymorphisms, SnpEff: SNPs in the genome of *Drosophila melanogaster* strain w1118; iso-2;  
614 iso-3. *Fly*, *6*(2), 80–92.



- 615 Cronin, M. A., Cánovas, A., Bannasch, D. L., Oberbauer, A. M., & Medrano, J. F. (2015). Single  
616 Nucleotide Polymorphism (SNP) Variation of Wolves (*Canis lupus*) in Southeast Alaska and  
617 Comparison with Wolves, Dogs, and Coyotes in North America. *The Journal of Heredity*,  
618 *106*(1), 26–36.
- 619 Davey, J. W., Hohenlohe, P. A., Etter, P. D., Boone, J. Q., Catchen, J. M., & Blaxter, M. L. (2011).  
620 Genome-wide genetic marker discovery and genotyping using next-generation sequencing.  
621 *Nature Reviews. Genetics*, *12*(7), 499–510.
- 622 Dong, Y., Xie, M., Jiang, Y., Xiao, N., Du, X., Zhang, W., Tosser-Klopp, G., Wang, J., Yang, S.,  
623 Liang, J., Chen, W., Chen, J., Zeng, P., Hou, Y., Bian, C., Pan, S., Li, Y., Liu, X., Wang, W., ...  
624 Wang, W. (2013). Sequencing and automated whole-genome optical mapping of the genome of a  
625 domestic goat (*Capra hircus*). *Nature Biotechnology*, *31*(2), 135–141.
- 626 Ewels, P., Magnusson, M., Lundin, S., & Käller, M. (2016). MultiQC: summarize analysis results for  
627 multiple tools and samples in a single report. *Bioinformatics*, *32*(19), 3047–3048.
- 628 Frankham, R. (2005). Genetics and extinction. *Biological Conservation*, *126*(2), 131–140.
- 629 Garvin, M. R., Saitoh, K., & Gharrett, A. J. (2010). Application of single nucleotide polymorphisms  
630 to non-model species: a technical review. *Molecular Ecology Resources*, *10*(6), 915–934.
- 631 Giacometti, M., Roganti, R., Tann, D. D., Stahlberger-Saitbekova, N., & Obexer-Ruff, G. (2004).  
632 Alpine ibex *Capra ibex ibex* x domestic goat *C. aegagrus domestica* hybrids in a restricted area  
633 of southern Switzerland. *Wildlife Biology*, *10*(1), 137–143.
- 634 Grodinsky, C., & Stüwe, M. (1987). With lots of help alpine ibex return to their mountains.  
635 *Smithsonian*, *18*(9), 68–77.
- 636 Grossen, C., Biebach, I., Angelone-Alasaad, S., Keller, L. F., & Croll, D. (2018). Population  
637 genomics analyses of European ibex species show lower diversity and higher inbreeding in  
638 reintroduced populations. *Evolutionary Applications*, *11*(2), 123–139.
- 639 Grossen, C., Guillaume, F., Keller, L. F., & Croll, D. (2020). Purging of highly deleterious mutations  
640 through severe bottlenecks in Alpine ibex. *Nature Communications*.  
641 <https://www.nature.com/articles/s41467-020-14803-1>

- 642 Grossen, C., Keller, L. F., Biebach, I., International Goat Genome Consortium, & Croll, D. (2014).  
643 Introgression from domestic goat generated variation at the major histocompatibility complex of  
644 Alpine ibex. *PLoS Genetics*, *10*(6), e1004438.
- 645 Hodel, R. G. J., Segovia-Salcedo, M. C., Landis, J. B., Crowl, A. A., Sun, M., Liu, X., Gitzendanner,  
646 M. A., Douglas, N. A., Germain-Aubrey, C. C., Chen, S., Soltis, D. E., & Soltis, P. S. (2016).  
647 The Report of My Death was an Exaggeration: A Review for Researchers Using Microsatellites  
648 in the 21st Century. *Applications in Plant Sciences*, *4*(6), 1600025.
- 649 Holderegger, R., Balkenhol, N., Bolliger, J., Engler, J. O., Gugerli, F., Hochkirch, A., Nowak, C.,  
650 Segelbacher, G., Widmer, A., & Zachos, F. E. (2019). Conservation genetics: Linking science  
651 with practice. *Molecular Ecology*, *28*(17), 3848–3856.
- 652 Jiang, Z., Wang, H., Michal, J. J., Zhou, X., Liu, B., Woods, L. C. S., & Fuchs, R. A. (2016). Genome  
653 Wide Sampling Sequencing for SNP Genotyping: Methods, Challenges and Future  
654 Development. *International Journal of Biological Sciences*, *12*(1), 100–108.
- 655 Kim, D., Paggi, J. M., Park, C., Bennett, C., & Salzberg, S. L. (2019). Graph-based genome alignment  
656 and genotyping with HISAT2 and HISAT-genotype. *Nature Biotechnology*, *37*(8), 907–915.
- 657 Korneliussen, T. S., Albrechtsen, A., & Nielsen, R. (2014). ANGSD: Analysis of Next Generation  
658 Sequencing Data. *BMC Bioinformatics*, *15*(1), 356.
- 659 Kosch, T. A., Silva, C. N. S., & Brannelly, L. A. (2019). Genetic potential for disease resistance in  
660 critically endangered amphibians decimated by chytridiomycosis. *Animal: An International*  
661 *Journal of Animal Bioscience*.  
662 <https://zslpublications.onlinelibrary.wiley.com/doi/abs/10.1111/acv.12459>
- 663 Langmead, B., & Salzberg, S. L. (2012). Fast gapped-read alignment with Bowtie 2. *Nature Methods*,  
664 *9*(4), 357–359.
- 665 Leigh, D. M., Lischer, H. E. L., Grossen, C., & Keller, L. F. (2018). Batch effects in a multiyear  
666 sequencing study: False biological trends due to changes in read lengths. *Molecular Ecology*  
667 *Resources*, *18*(4), 778–788.
- 668 Li, H., Handsaker, B., Wysoker, A., Fennell, T., Ruan, J., Homer, N., Marth, G., Abecasis, G.,

- 669 Durbin, R., & 1000 Genome Project Data Processing Subgroup. (2009). The Sequence  
670 Alignment/Map format and SAMtools. *Bioinformatics*, 25(16), 2078–2079.
- 671 Magoč, T., & Salzberg, S. L. (2011). FLASH: fast length adjustment of short reads to improve  
672 genome assemblies. *Bioinformatics*, 27(21), 2957–2963.
- 673 McKenna, A., Hanna, M., Banks, E., Sivachenko, A., Cibulskis, K., Kernytsky, A., Garimella, K.,  
674 Altshuler, D., Gabriel, S., Daly, M., & DePristo, M. A. (2010). The Genome Analysis Toolkit: A  
675 MapReduce framework for analyzing next-generation DNA sequencing data. *Genome Research*,  
676 20(9), 1297–1303.
- 677 Meisner, J., & Albrechtsen, A. (n.d.). *Inferring Population Structure and Admixture Proportions in*  
678 *Low-Depth NGS Data*. 13.
- 679 Mick, V., Le Carrou, G., Corde, Y., Game, Y., Jay, M., & Garin-Bastuji, B. (2014). *Brucella*  
680 *melitensis* in France: persistence in wildlife and probable spillover from Alpine ibex to domestic  
681 animals. *PloS One*, 9(4), e94168.
- 682 O'Brien, S. J., Johnson, W. E., Driscoll, C. A., Dobrynin, P., & Marker, L. (2017). Conservation  
683 Genetics of the Cheetah: Lessons Learned and New Opportunities. *The Journal of Heredity*,  
684 108(6), 671–677.
- 685 O'Brien, S. J., Roelke, M., Marker, L., Newman, A., Winkler, C., Meltzer, D., Colly, L., Evermann,  
686 J., Bush, M., & Wildt, D. (1985). Genetic basis for species vulnerability in the cheetah. *Science*,  
687 227(4693), 1428–1434.
- 688 O'Brien, S. J., Wildt, D. E., Goldman, D., Merril, C. R., & Bush, M. (1983). The Cheetah Is  
689 Depauperate in Genetic Variation. *Science*, 221(4609), 459–462.
- 690 Ouborg, N. J., Pertoldi, C., Loeschcke, V., Bijlsma, R. K., & Hedrick, P. W. (2010). Conservation  
691 genetics in transition to conservation genomics. *Trends in Genetics: TIG*, 26(4), 177–187.
- 692 Pertoldi, C., Tokarska, M., Wójcik, J. M., Demontis, D., Loeschcke, V., Gregersen, V. R., Coltman,  
693 D., Wilson, G. A., Randi, E., Hansen, M. M., & Bendixen, C. (2009). Depauperate genetic  
694 variability detected in the American and European bison using genomic techniques. *Biology*  
695 *Direct*, 4, 48; discussion 48.

- 696 Pimm, S. L., Dollar, L., & Bass, O. L. (2006). The genetic rescue of the Florida panther. *Animal*  
697 *Conservation*, 9(2), 115–122.
- 698 Quéméré, E., Rossi, S., Petit, E., Marchand, P., Merlet, J., Game, Y., Galan, M., & Gilot-Fromont, E.  
699 (2020). Genetic epidemiology of the Alpine ibex reservoir of persistent and virulent brucellosis  
700 outbreak. *Scientific Reports*, 10(1), 4400.
- 701 Quinlan, A. R., & Hall, I. M. (2010). BEDTools: a flexible suite of utilities for comparing genomic  
702 features. *Bioinformatics*, 26(6), 841–842.
- 703 Reed, D. H., & Frankham, R. (2003). Correlation between Fitness and Genetic Diversity.  
704 *Conservation Biology: The Journal of the Society for Conservation Biology*, 17(1), 230–237.
- 705 Roelke, M. E., Martenson, J. S., & O'Brien, S. J. (1993). The consequences of demographic reduction  
706 and genetic depletion in the endangered Florida panther. *Current Biology: CB*, 3(6), 340–350.
- 707 Savage, A. E., Sredl, M. J., & Zamudio, K. R. (2011). Disease dynamics vary spatially and temporally  
708 in a North American amphibian. *Biological Conservation*, 144(6), 1910–1915.
- 709 Schoville, S. D., Bonin, A., François, O., Lobreaux, S., Melodelima, C., & Manel, S. (2012). Adaptive  
710 Genetic Variation on the Landscape: Methods and Cases. *Annual Review of Ecology, Evolution,*  
711 *and Systematics*, 43(1), 23–43.
- 712 Siddle, H. V., Kreiss, A., Eldridge, M. D. B., Noonan, E., Clarke, C. J., Pyecroft, S., Woods, G. M., &  
713 Belov, K. (2007). Transmission of a fatal clonal tumor by biting occurs due to depleted MHC  
714 diversity in a threatened carnivorous marsupial. *Proceedings of the National Academy of*  
715 *Sciences of the United States of America*, 104(41), 16221–16226.
- 716 Skotte, L., Korneliussen, T. S., & Albrechtsen, A. (2013). Estimating Individual Admixture  
717 Proportions from Next Generation Sequencing Data. *Genetics*, 195(3), 693–702.
- 718 Steiner, C. C., Putnam, A. S., Hoeck, P. E. A., & Ryder, O. A. (2013). Conservation genomics of  
719 threatened animal species. *Annual Review of Animal Biosciences*, 1, 261–281.
- 720 Steyer, K., Kraus, R. H. S., Mölich, T., Anders, O., Cocchiararo, B., Frosch, C., Geib, A., Götz, M.,  
721 Herrmann, M., Hupe, K., Kohlen, A., Krüger, M., Müller, F., Pir, J. B., Reiners, T. E., Roch, S.,  
722 Schade, U., Schiefenhövel, P., Siemund, M., ... Nowak, C. (2016). Large-scale genetic census of

- 723 an elusive carnivore, the European wildcat (*Felis s. silvestris*). *Conservation Genetics* , 17(5),  
724 1183–1199.
- 725 Tarasov, A., Vilella, A. J., Cuppen, E., Nijman, I. J., & Prins, P. (2015). Sambamba: fast processing  
726 of NGS alignment formats. *Bioinformatics* , 31(12), 2032–2034.
- 727 Terrier, G., & Rossi, P. (1994). Le bouquetin (*Capra ibex ibex*) dans les Alpes Maritimes Franco-  
728 Italiennes: occupation de l'espace, colonisation et régulation naturelles. *Travaux Scientifiques Du*  
729 *Parc National de La Vanoise*, 18, 271–287.
- 730 Todesco, M., Pascual, M. A., Owens, G. L., Ostevik, K. L., Moyers, B. T., Hübner, S., Heredia, S. M.,  
731 Hahn, M. A., Caseys, C., Bock, D. G., & Rieseberg, L. H. (2016). Hybridization and extinction.  
732 *Evolutionary Applications*, 9(7), 892–908.
- 733 Tosser-Klopp, G., Rothschild, M. F., Huson, H. J., Nicolazzi, E. L., Sonstegard, T. S., Amills, M.,  
734 Riggs, P., Van Tassell, C. P., Marsan, P. A., Stella, A., & Others. (2015). Update on the  
735 International Goat Genome Consortium Projects. *Plant and Animal Genome*.  
736 <https://hal.inrae.fr/hal-02800945>
- 737 Tschirren, B., Andersson, M., Scherman, K., Westerdahl, H., Mittl, P. R. E., & Råberg, L. (2013).  
738 Polymorphisms at the innate immune receptor TLR2 are associated with *Borrelia* infection in a  
739 wild rodent population. *Proceedings. Biological Sciences / The Royal Society*, 280(1759),  
740 20130364.
- 741 Turner, A. K., Begon, M., Jackson, J. A., Bradley, J. E., & Paterson, S. (2011). Genetic Diversity in  
742 Cytokines Associated with Immune Variation and Resistance to Multiple Pathogens in a Natural  
743 Rodent Population. *PLoS Genetics*, 7(10), e1002343.
- 744 Van der Auwera, G. A., Carneiro, M. O., Hartl, C., Poplin, R., Del Angel, G., Levy-Moonshine, A.,  
745 Jordan, T., Shakir, K., Roazen, D., Thibault, J., Banks, E., Garimella, K. V., Altshuler, D.,  
746 Gabriel, S., & DePristo, M. A. (2013). From FastQ data to high confidence variant calls: the  
747 Genome Analysis Toolkit best practices pipeline. *Current Protocols in Bioinformatics / Editorial*  
748 *Board, Andreas D. Baxevanis ... [et Al.]*, 43, 11.10.1–11.10.33.
- 749 Willisch, C. S., Biebach, I., Koller, U., Bucher, T., Marreros, N., Ryser-Degiorgis, M.-P., Keller, L.

- 750 F., & Neuhaus, P. (2012). Male reproductive pattern in a polygynous ungulate with a slow life-  
751 history: the role of age, social status and alternative mating tactics. *Evolutionary Ecology*, 26(1),  
752 187–206.
- 753 Witzemberger, K. A., & Hochkirch, A. (2014). The genetic integrity of the ex situ population of the  
754 European wildcat (*Felis silvestris silvestris*) is seriously threatened by introgression from  
755 domestic cats (*Felis silvestris catus*). *PloS One*, 9(8), e106083.
- 756 Wwf. (2018). *Living Planet Report - 2018: Aiming Higher* (Grooten, M. and Almond, R.E.A.(Eds)).  
757 WWF.
- 758 Yates, A. D., Achuthan, P., Akanni, W., Allen, J., Allen, J., Alvarez-Jarreta, J., Amode, M. R.,  
759 Armean, I. M., Azov, A. G., Bennett, R., Bhai, J., Billis, K., Boddu, S., Marugán, J. C.,  
760 Cummins, C., Davidson, C., Dodiya, K., Fatima, R., Gall, A., ... Flicek, P. (2019). Ensembl  
761 2020. *Nucleic Acids Research*, gkz966.
- 762 Zhu, Y., Grueber, C., Li, Y., He, M., Hu, L., He, K., Liu, H., Zhang, H., & Wu, H. (2020). MHC-  
763 associated *Baylisascaris schroederi* load informs the giant panda reintroduction program.  
764 *International Journal for Parasitology. Parasites and Wildlife*, 12, 113–120.
- 765 Camille Kessler, Alice Brambilla, Dominique Waldvogel, Glauco Camenisch, Iris Biebach, Deborah  
766 M Leigh, Christine Grossen, Daniel Croll; 2020; Amplicon sequencing of Alpine ibex; NCBI SRA;  
767 BioProject PRJNA669599  
768  
769 Christine Grossen, Frederic Guillaume, Lukas F. Keller, Daniel Croll; 2020; Whole-genome  
770 sequencing of ibex species; NCBI SRA; BioProject PRJNA514886  
771  
772 NextGen consortium; Next generation methods to preserve farm animal biodiversity NEXTGEN;  
773 2014; NCBI SRA; ERR470105, ERR470101, ERR313212, ERR313211, ERR313204, ERR297229,  
774 ERR313206, ERR405774, ERR405778, ERR315778, ERR318768, ERR246140, ERR340429,  
775 ERR246152, ERR345976, ERR340334, ERR340340, ERR340333, ERR340331, ERR340335,  
776 ERR340348, ERR157945, ERR299288, ERR157938, ERR454948, SRR501898  
777

778 Data accessibility: The raw amplicon sequencing data produced for this project was deposited at the  
779 NSBI Short Read Archive under the Bioproject Accession number PRJNA669599. The raw whole-  
780 genome sequencing data produced for this project was deposited at the NCBI Short Read Archive under  
781 the Accession nos. SAMN10736122–SAMN10736160 (BioProject PRJNA514886  
782 [<https://www.ncbi.nlm.nih.gov/sra/PRJNA514886>]). The whole-genome data produced by the NexGen  
783 Consortium (Capra hircus accessions: ERR470105, ERR470101, ERR313212, ERR313211,  
784 ERR313204, ERR297229, ERR313206, ERR405774, ERR405778, ERR315778, ERR318768,  
785 ERR246140, ERR340429, ERR246152, ERR345976, Capra aegagrus accessions: ERR340334,  
786 ERR340340, ERR340333, ERR340331, ERR340335, ERR340348; Ovis aries accessions: ERR157945,  
787 ERR299288; Ovis orientalis : ERR157938; Ovis vignei: ERR454948; Ovis canadensis: SRR501898)  
788 was downloaded from [<ftp://ftp.sra.ebi.ac.uk/vol1/fastq>].

789

790 Author contributions: CK, CG and DC conceived the study, CK, DW, GC, IB and CG performed  
791 analyses, AB contributed samples, DL contributed datasets, CK, CG and DC wrote the manuscript

792

793 **Figures**

794

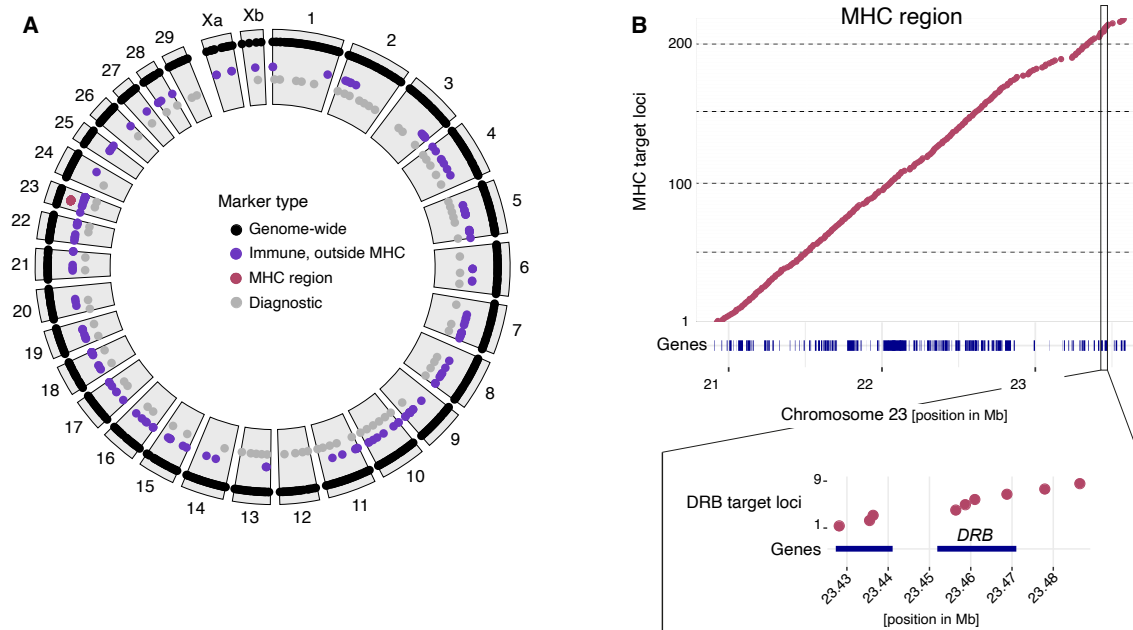

795

796 **Figure 1: Design and distribution of targeted amplicon sequencing loci.** A) Distribution along  
797 chromosomes for each marker category (genome-wide, immune loci, MHC region, diagnostic); B)  
798 Regularly spaced loci across the MHC region on chromosome 23 (20.89-23.59 Mb). Blue segments  
799 identify coding sequences in the MHC. The *DRB* gene region of the MHC (zoom view)  
800 by a denser array of loci.



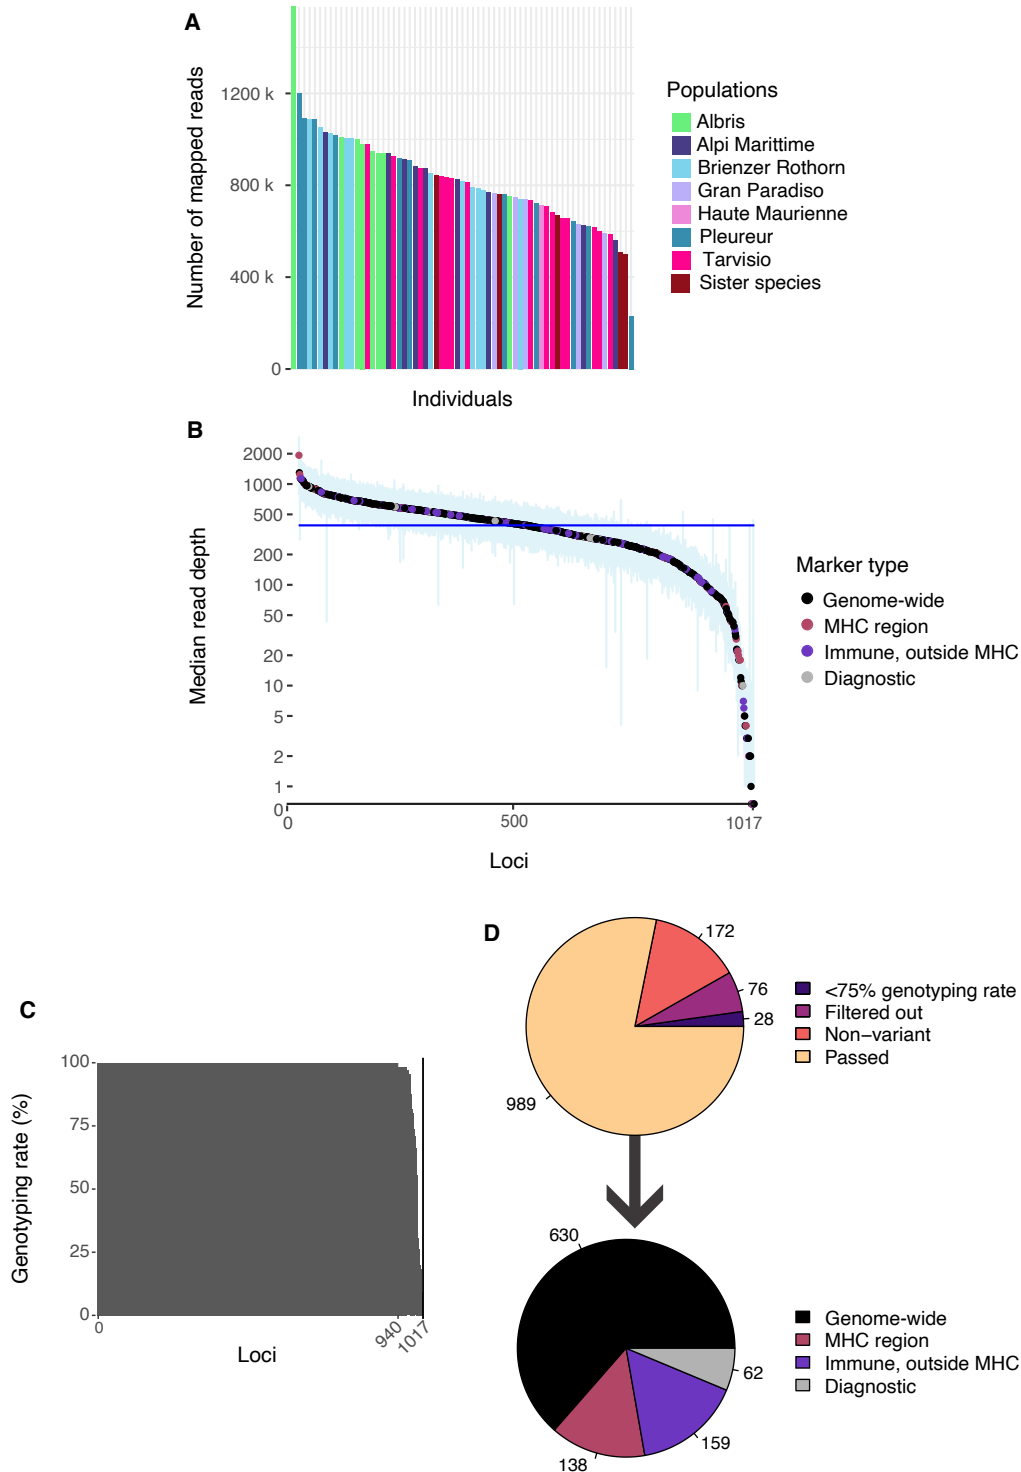

801  
 802 **Figure 2: Assessment of amplification consistency and genotyping rates.** A) Number of mapped  
 803 reads per individual sample, colored by population ( $N=65$ ). Seven Alpine ibex populations are shown  
 804 in addition to domestic goats ( $N=2$ ) and Iberian ibex ( $N=3$ ). Low-quality input DNA samples (fecal  
 805 samples, etc.) were excluded. B) Median read depth per locus across 1017 amplicon loci. Markers are  
 806 colored according to their category. The blue line represents the median (389) and the blue area  
 807 represents the 95% confidence interval for each marker. C) Variation in genotyping rates across the  
 808 1017 loci. D) Outcomes of the different filtering stages. A total of 989 loci were retained for further  
 809 analyses. The marker category of the retained markers is shown below.

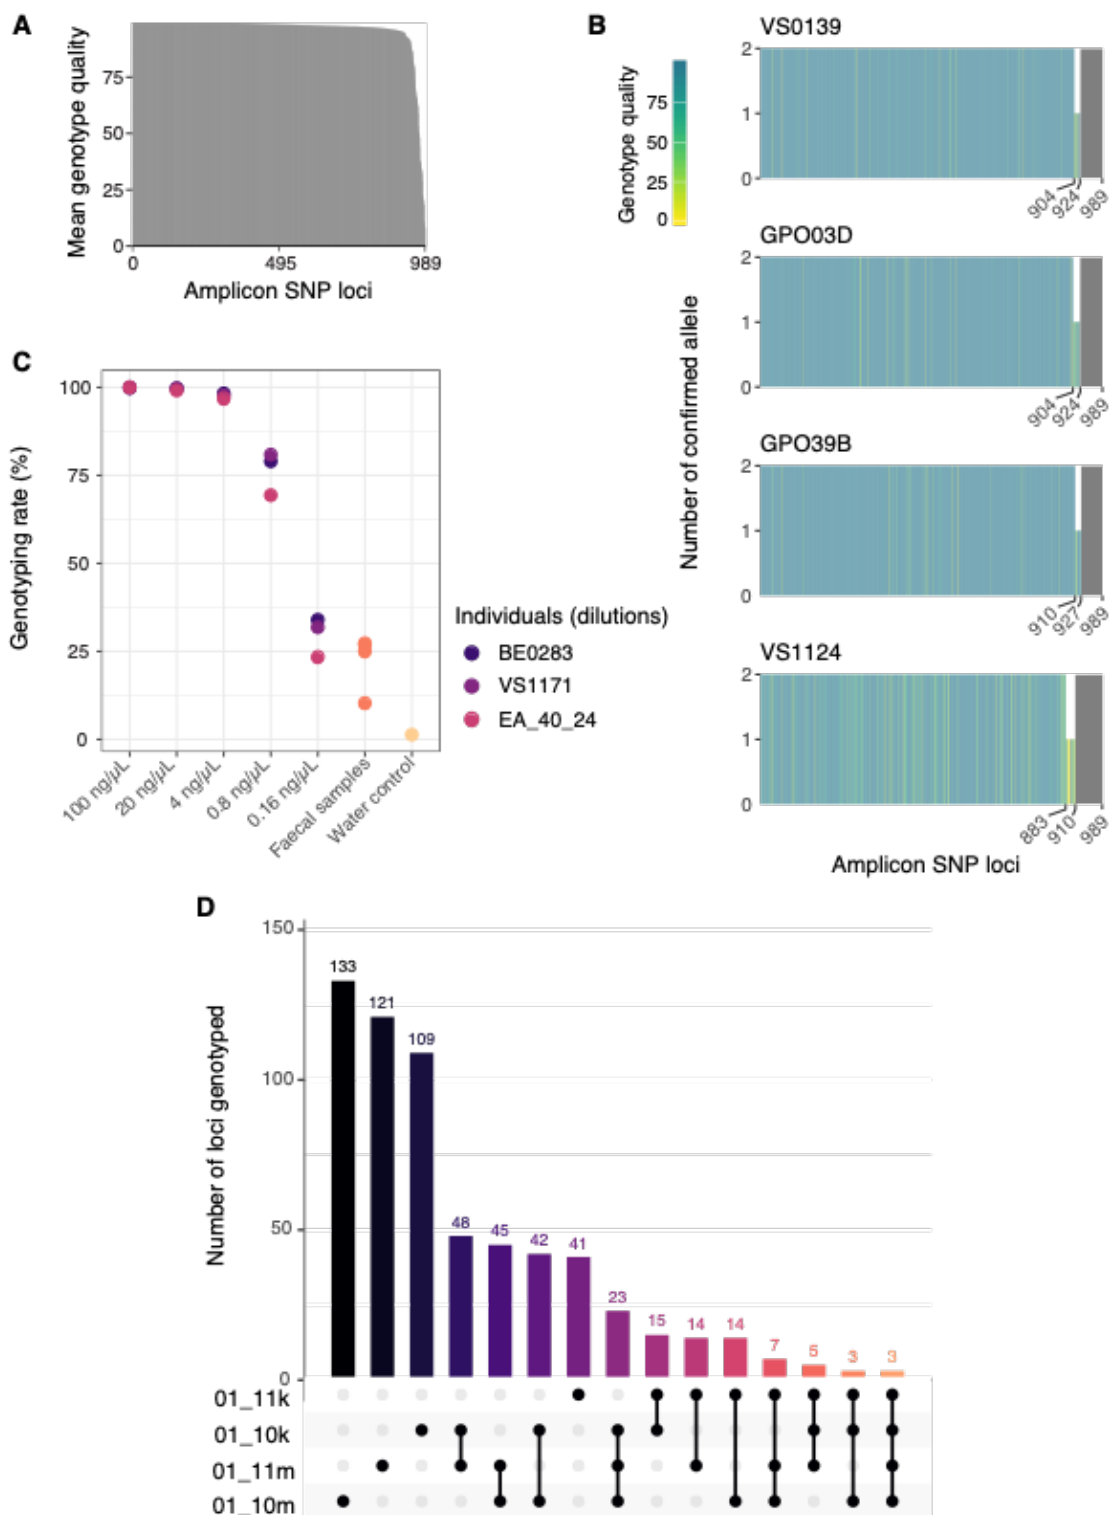

810  
 811 **Figure 3: Genotyping accuracy and performance with low-quality or low-quantity input DNA.**  
 812 A) Mean genotyping quality (GQ) for each high-quality locus across the 65 high-quality DNA samples.  
 813 B) Genotype accuracy assessed by matching recovered alleles from the targeted amplicon sequencing  
 814 and whole-genome sequencing of the same four individuals. C) Assessment of genotyping rates for  
 815 serial dilutions of three individuals and four fecal samples. D) Analysis of genotyped loci shared among  
 816 the four fecal samples. The overlaps show recovered genotypes out of a total of 989 loci.

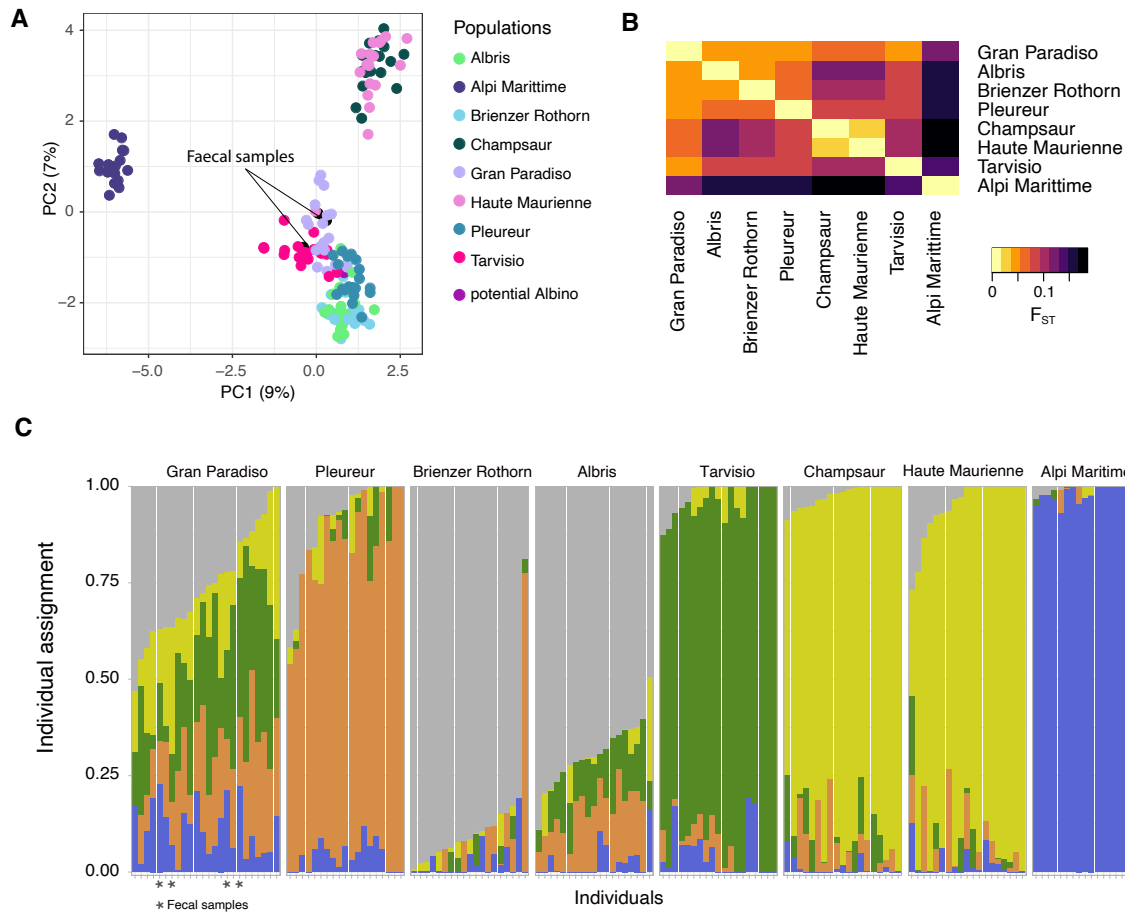

817  
 818 **Figure 4: Population genetic analyses of Alpine ibex.** A) Principal component analysis of 158 Alpine  
 819 ibex individuals based on 617 genome-wide SNP loci designed for capturing genome-wide population  
 820 differentiation. B) Pairwise  $F_{ST}$  matrix of all Alpine ibex populations based on genome-wide SNPs.  
 821 Gran Paradiso was the only population surviving the near extinction and hence is the source population  
 822 of all existing Alpine ibex populations. The Swiss populations Albris, Pleureur, Brienzer Rothorn and  
 823 the Italian population Alpi Maritime were founded in early 1900 from Gran Paradiso individuals. The  
 824 populations Tarvisio, Champsaur and Haute Maurienne were later founded independently from Gran  
 825 Paradiso individuals. C) Structure-like analysis (based on sparse non-negative matrix factorization  
 826 algorithms) of all Alpine ibex with  $K=5$ . \*) fecal samples.

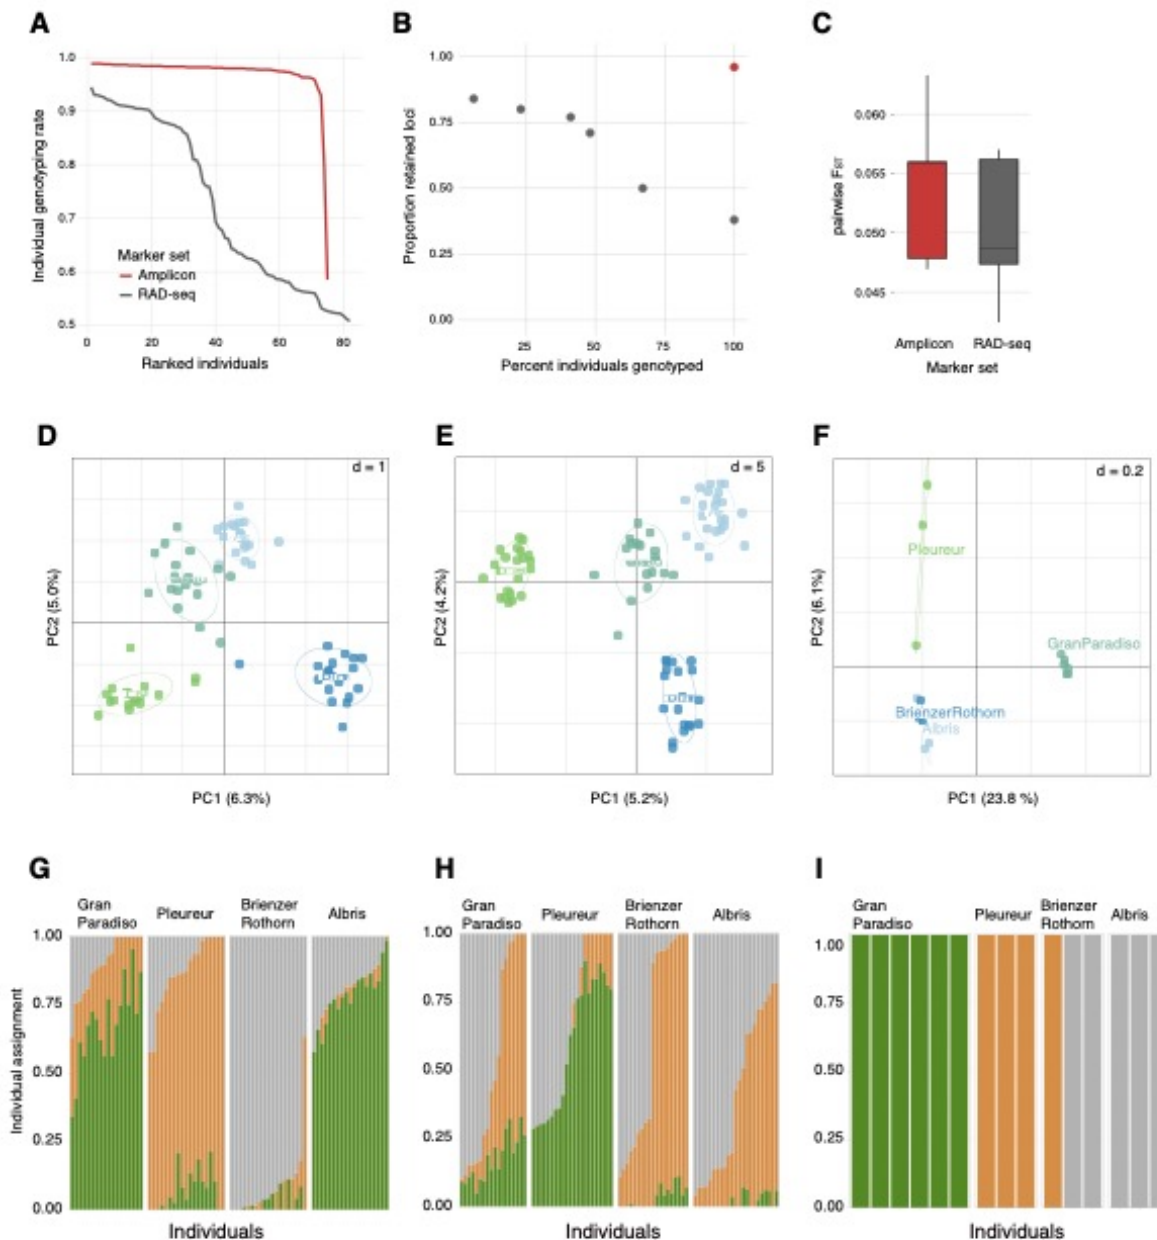

827  
828  
829  
830  
831  
832  
833  
834  
835  
836  
837

**Figure 5: Performance comparisons between targeted amplicon sequencing, RAD-seq and low-coverage whole genome sequencing on four Alpine ibex populations.** A) Individual genotyping rate ranked by individual for amplicon sequencing and RAD-seq. B) Proportion of SNP loci retained at a genotyping rate of 90% as a function of the percent of individuals included. The comparison is only meaningful for amplicon sequencing and RAD-seq. C) Boxplot of all pairwise  $F_{ST}$  estimates among populations for the amplicon sequencing and RAD-seq. D-F) Principal component analysis of population differentiation for (D) the amplicon sequencing (plotted are -PC1 against -PC2), (E) RAD-seq and (F) low-coverage whole-genome sequencing. Structure-like analysis (based on sparse non-negative matrix factorization algorithms) of (G) the amplicon sequencing, (H) RAD-seq and (I) low-coverage whole-genome sequencing datasets. I) is based on a NGSadmix analysis (Skotte et al., 2013).

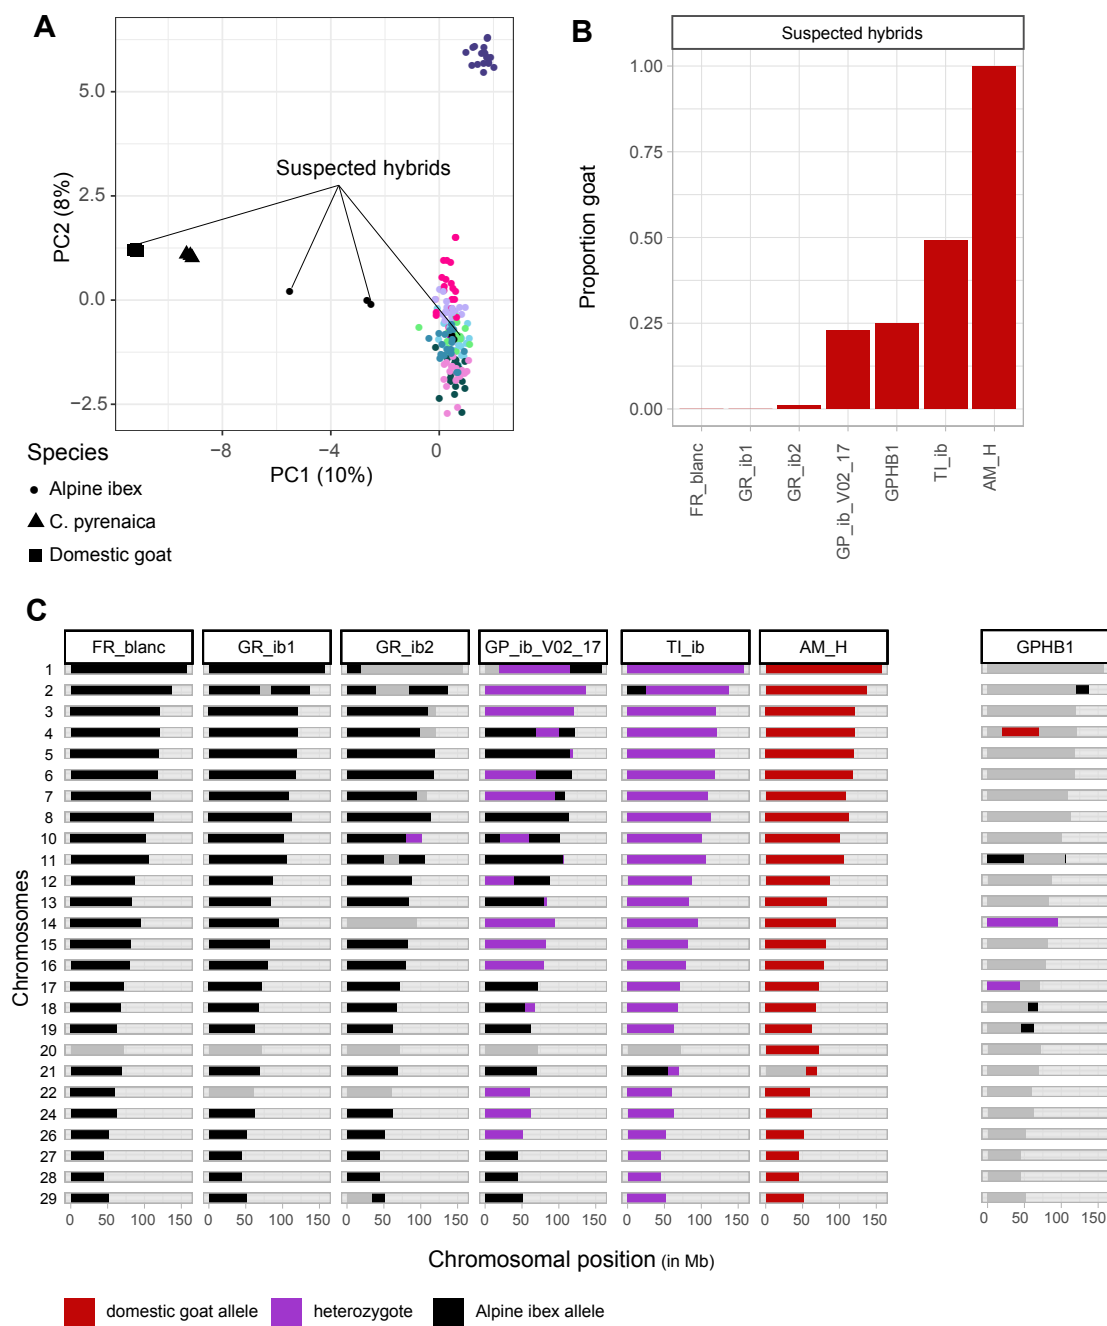

838  
 839 **Figure 6: Performance of targeted amplicon sequencing to detect recent hybridization events.** A)  
 840 Principal component analysis of 168 individuals (excluding fecal samples) including domestic goat and  
 841 Iberian ibex (N=5 and 3) and suspected hybrids based on phenotypic observations (N=6). The PCA was  
 842 performed based on 617 genome-wide SNP loci designed for capturing putatively neutral population  
 843 differentiation. B) Analysis of diagnostic markers for the detection of hybrids for 6 suspected hybrids  
 844 and one potential albino. The proportion of diagnostic markers assigned to domestic goat are shown,  
 845 where the proportion is calculated as  $(1 \times \text{homozygous goat genotype} + \frac{1}{2} \times \text{heterozygous}$   
 846  $\text{genotype}) / (\text{total genotypes at diagnostic markers})$ . C) Chromosome painting using diagnostic markers  
 847 along the 29 autosomes. Colors identify Alpine ibex (blue), heterozygous (purple) and domestic goat  
 848 (red) genotypes. Sample GPHB1 was of low DNA quality and quantity (drop of blood conserved on  
 849 FTA filter paper; see Methods).

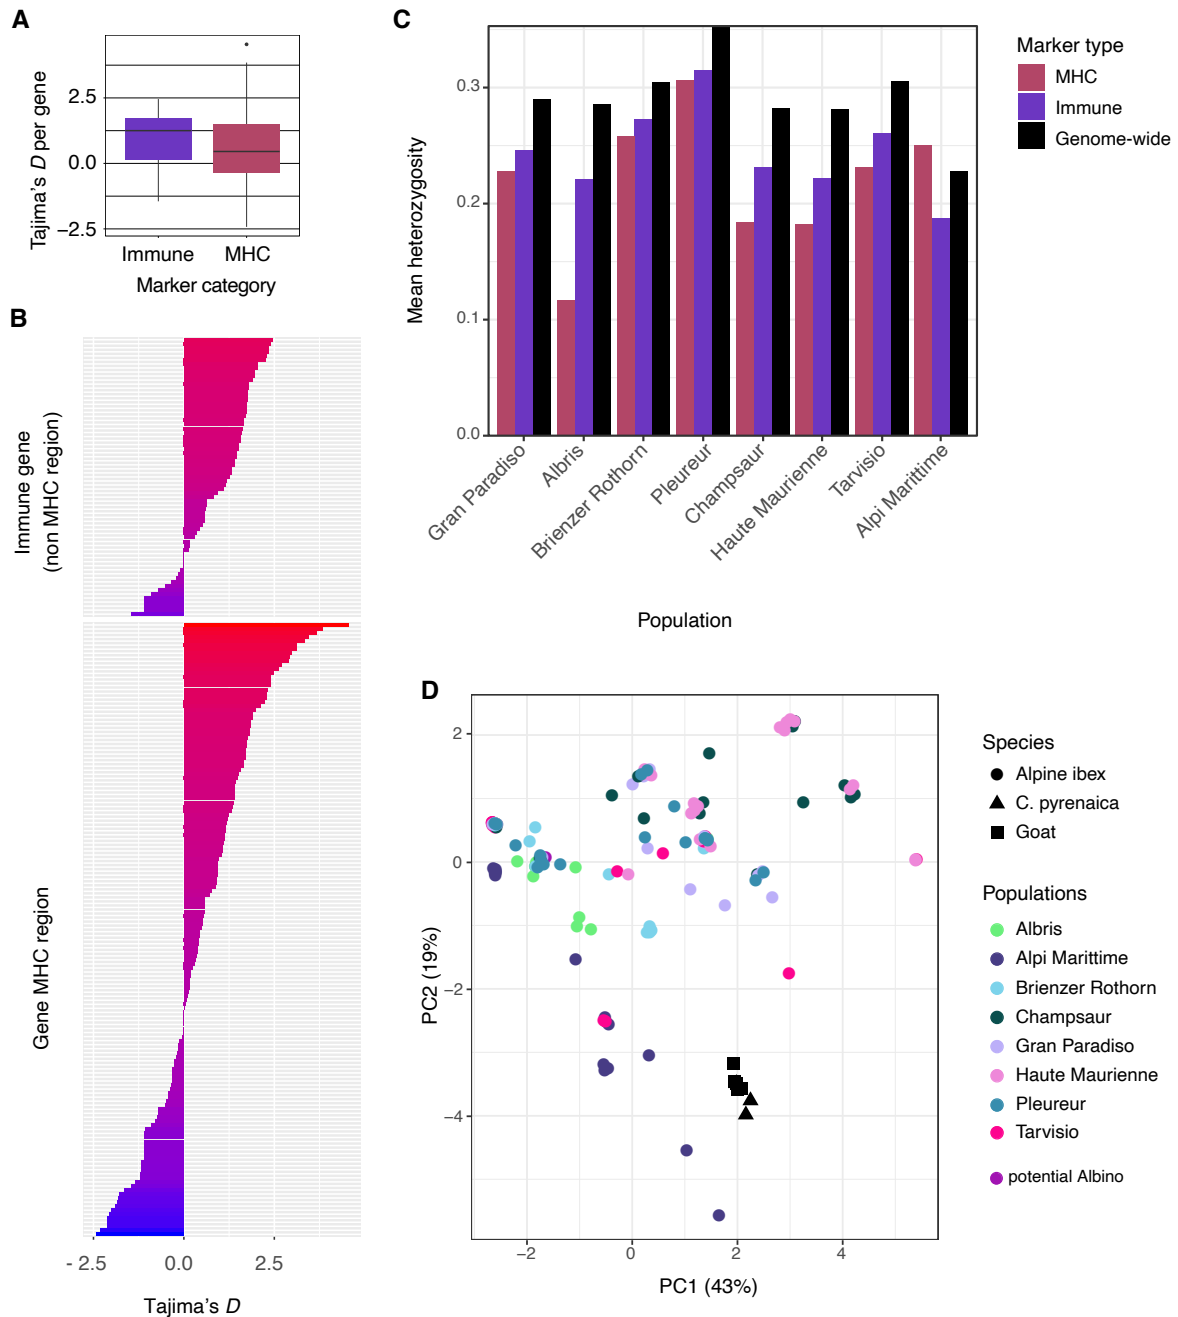

850

851 **Figure 7: Genome-wide immunogenetics survey of Alpine ibex populations.** A) Boxplot of Tajima's

852  $D$  estimates based on whole-genome sequencing of 29 Alpine ibex of immune-related loci covered by

853 the targeted amplicon sequencing assay. The MHC region is shown separately from other immune-

854 related loci. B) Tajima's  $D$  estimates shown per each gene represented by immune-related loci covered

855 by the targeted amplicon sequencing assay. C) Targeted amplicon sequencing analyses of

856 heterozygosity across Alpine ibex populations ( $N=154$ , excluding fecal samples). Heterozygosity is

857 shown separately for genome-wide SNPs, the MHC region and other immune-related SNP loci. D)

858 Principal component analysis of Alpine ibex and sister species based on 138 SNPs genotyped in the

859 MHC region using targeted amplicon sequencing.

860

861 **Supplementary Information**

862 (SupplementaryTables.xlsx)

863

864 **Supplementary Table S1: Overview of individual sampling.** Overview of all sequenced individuals  
865 analysed in this study including information of species, population, inclusion in high-quality samples  
866 and sample type.

867

868 **Supplementary Table S2: Overview of SNP positions included in the marker design.** Shown are  
869 marker type (Genome-wide, Diagnostic, MHC region, Immune), Batch (1st or 2nd submission to  
870 Fluidigm for marker design), Exclusion (N: Kept in final marker set, Y: Yes, excluded due to quality  
871 checks), Excluded\_by (N\_percentage: contained >50% masked positions in the sequence surrounding  
872 the focal SNP; Fluidigm: marker did not pass Fluidigm design principles; VariantFiltration: marker  
873 failed GATK hard filtering; Non\_variant: marker was invariant; <75%: genotyping rate was below 75%  
874 among individuals), functional annotation is based on SnpEff.

875

876 **Supplementary Table S3: Individual read numbers.** Given are read numbers per each individual  
877 before and after quality trimming, merging and genome alignment.

878

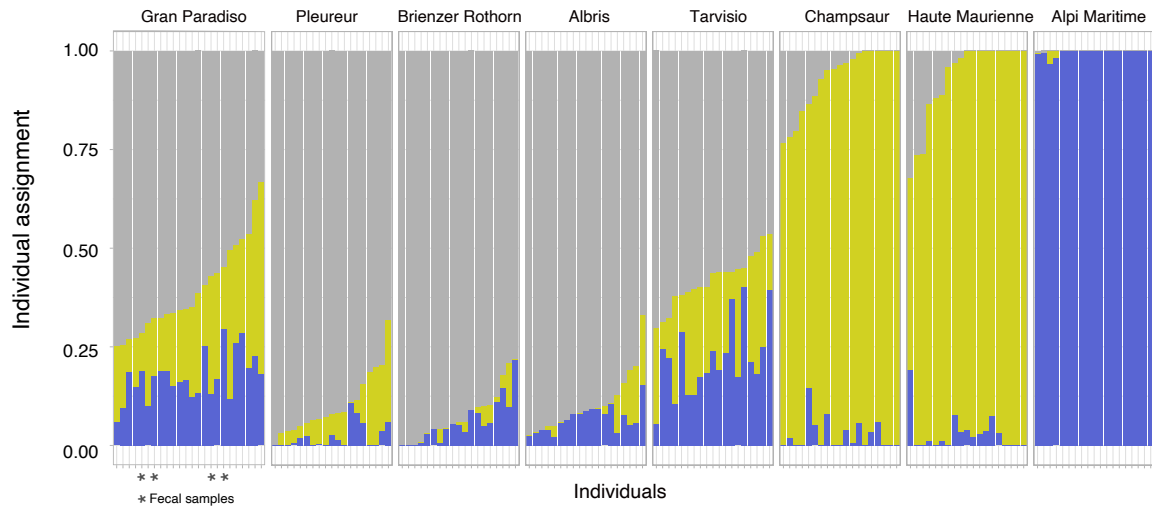

879

880

881 **Supplementary Figure 1: Population genetic analyses of Alpine ibex.** Structure-like visualization

882 (based on sparse non-negative matrix factorization algorithms) of all Alpine ibex with  $K=3$ .

883

884

885

886

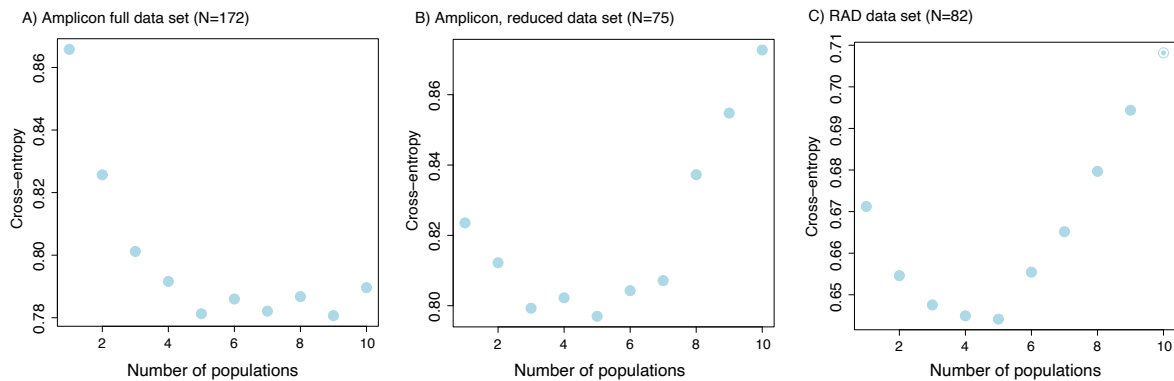

887

888

889 **Supplementary Figure 2: Structure-like analysis of Alpine ibex.** Shown is the distribution of entropy

890 for  $K$  varied from 1 to 10 (100 replicates each) for the Structure-like analysis (sparse non-negative

891 matrix factorization algorithms) based on (A) the full Alpine ibex amplicon data set, (B) the reduced

892 amplicon data (for methods comparison) and (C) the RAD data.
